# Supplementary material
Source: PubMed Central journal article supplement (PMC3336735)
Supplement: ja300654t_si_001.pdf [file ja300654t_si_001.pdf]

## Supporting material

# Dispersion Energy Enforced Dimerization of a Cyclic Disilylated Plumbylene

Henning Arp, Judith Baumgartner\* and Christoph Marschner\*

Patrick Zark, Thomas Müller\*

|                           |     |
|---------------------------|-----|
| Crystallographic Material | S2  |
| Computational Details     | S5  |
| References                | S27 |

Crystallographic Material

**Table S1.** Crystallographic Data for Compounds **2**, **3**, and **4**.

|                                                           | <b>2</b>                                           | <b>3</b>                                                           | <b>4</b>                                                         |
|-----------------------------------------------------------|----------------------------------------------------|--------------------------------------------------------------------|------------------------------------------------------------------|
| Empirical formula                                         | PbPSi <sub>8</sub> C <sub>22</sub> H <sub>63</sub> | PbBSi <sub>8</sub> F <sub>15</sub> C <sub>34</sub> H <sub>48</sub> | Pb <sub>2</sub> Si <sub>16</sub> C <sub>32</sub> H <sub>96</sub> |
| M <sub>w</sub>                                            | 790.60                                             | 1184.44                                                            | 1344.91                                                          |
| Temperature [K]                                           | 100(2)                                             | 100(2)                                                             | 110(2)                                                           |
| Size [mm]                                                 | 0.36x0.20x0.20                                     | 0.36x0.26x0.12                                                     | 0.38x0.33x0.20                                                   |
| Crystal system                                            | monoclinic                                         | triclinic                                                          | monoclinic                                                       |
| Space group                                               | P2(1)/c                                            | P-1                                                                | P2(1)/n                                                          |
| a [Å]                                                     | 9.701(2)                                           | 11.896(2)                                                          | 15.913(3)                                                        |
| b [Å]                                                     | 21.430(4)                                          | 12.182(3)                                                          | 18.062(4)                                                        |
| c [Å]                                                     | 19.585(4)                                          | 20.051(4)                                                          | 23.793(5)                                                        |
| α [°]                                                     | 90                                                 | 81.96(3)                                                           | 90                                                               |
| β [°]                                                     | 104.19(3)                                          | 74.89(3)                                                           | 98.49(3)                                                         |
| γ [°]                                                     | 90                                                 | 61.25(3)                                                           | 90                                                               |
| V [Å <sup>3</sup> ]                                       | 3947(2)                                            | 2459(2)                                                            | 6764(2)                                                          |
| Z                                                         | 4                                                  | 2                                                                  | 4                                                                |
| ρ <sub>calc</sub> [gcm <sup>-3</sup> ]                    | 1.330                                              | 1.600                                                              | 1.321                                                            |
| Absorption coefficient [mm <sup>-1</sup> ]                | 4.569                                              | 3.707                                                              | 5.274                                                            |
| F(000)                                                    | 1616                                               | 1172                                                               | 2704                                                             |
| θ range                                                   | 1.43<θ<26.37                                       | 1.05<θ<26.37                                                       | 1.45<θ<25.00                                                     |
| Reflections collected/unique                              | 30193/7996                                         | 19515/9890                                                         | 20045/11463                                                      |
| Completeness to θ [%]                                     | 99.0                                               | 98.3                                                               | 96.3                                                             |
| Data/restraints/parameters                                | 7996/0/308                                         | 9890/0/548                                                         | 11463/0/483                                                      |
| Goodness of fit on F <sup>2</sup>                         | 1.07                                               | 1.04                                                               | 0.95                                                             |
| Final R indices [I>2σ(I)]                                 | R1=0.058,<br>wR2=0.160                             | R1=0.049,<br>wR2=0.113                                             | R1=0.069,<br>wR2=0.161                                           |
| R indices (all data)                                      | R1=0.064,<br>wR2=0.162                             | R1=0.056,<br>wR2=0.116                                             | R1=0.109,<br>wR2=0.177                                           |
| Largest diff. Peak/hole [e <sup>-</sup> /Å <sup>3</sup> ] | 5.00/-4.56                                         | 4.36/-1.77                                                         | 2.21/-1.96                                                       |

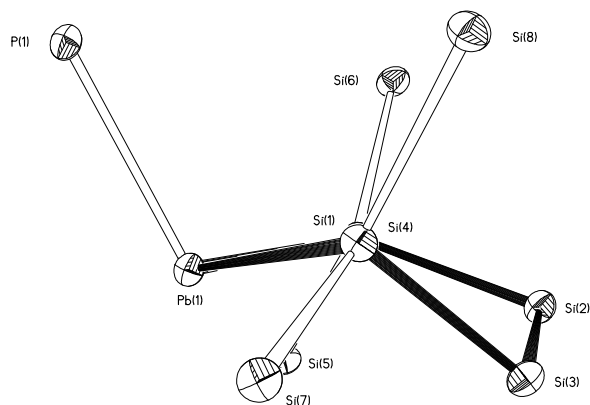

**Figure S1.** Part of the molecular structure of **2**: Plane: Si(1)-Pb(1)-Si(4) orthogonal distance P1-plane = 259 pm  $\beta$  P(1)Pb(1)-plane:  $71.2^\circ$   $\alpha$  Si(4)-Pb(1)-Si(1) =  $95.67(8)^\circ$

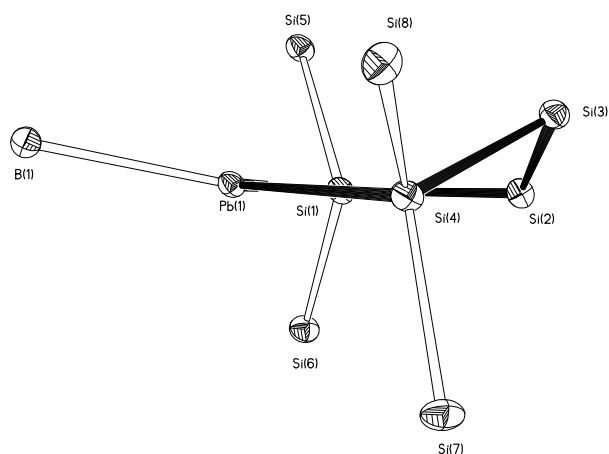

**Figure S2.** Part of the molecular structure of **3**: Plane: Si(1)-Pb(1)-Si(4) orthogonal distance B(1)-plane = 34 pm,  $\beta$  B-Pb-plane:  $7.9^\circ$ ,  $\alpha$  Si(1)-Pb(1)-Si(4) =  $102.80(6)^\circ$

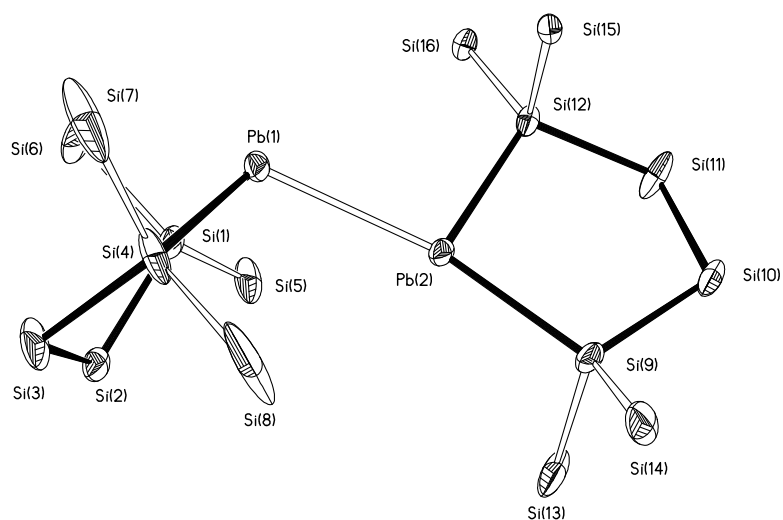

**Figure S3.** Part of molecular structure of **4**: Plane: Si(1)-Pb(1)-Si(4) orthogonal distance Pb(2)-plane = 280 pm,  $\beta$  Pb(2)-Pb(1)-plane =  $66^\circ$ ,  $\alpha$  Si(4)-Pb(1)-Si(1) =  $94.38(12)^\circ$

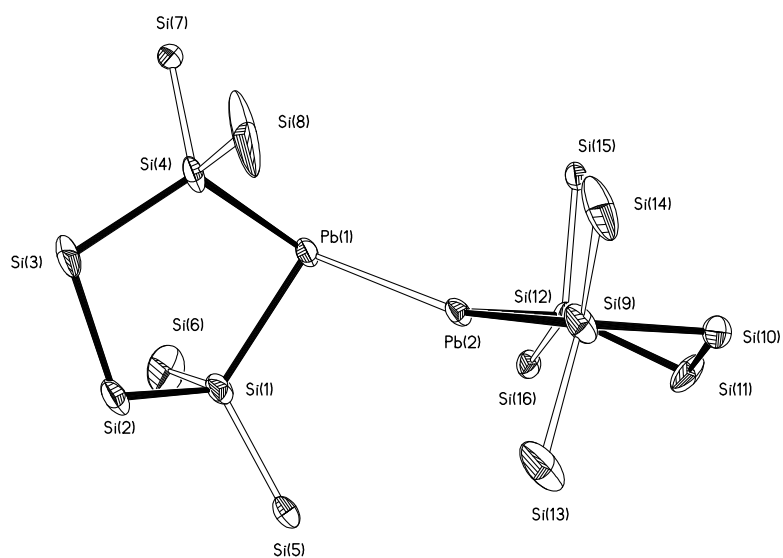

**Figure S4.** Part of the molecular structure of **4**: Plane: Si(1)-Pb(2)-Si(4) orthogonal distance Pb(1)-plane = 80 pm,  $\beta$  Pb(1)-Pb(2)-plane =  $15.1^\circ$ ,  $\alpha$  Si(12)-Pb(2)-Si(9) =  $96.49(10)^\circ$

## Computational Details.

All geometry optimizations and natural bond orbital<sup>1</sup> (NBO) analyses were carried out using Gaussian09 package.<sup>2</sup> Unless otherwise noted all quantum chemical calculations were performed at the M06-2X level of theory<sup>3</sup> using the standard 6-31G(d) Pople basis set<sup>4-6</sup> for all second and third row elements and quasirelativistic Stuttgart Dresden pseudo potential SDD<sup>7</sup> for lead (6-31G(d) for H, B, C, F, Si, P, SDD for Pb). This basis set is denoted as basis set A. Every stationary point was identified by a subsequent frequency calculation. To verify the calculated structural data small molecules (PbH<sub>2</sub>, Pb<sub>2</sub>H<sub>4</sub>) were computed at the CCSD<sup>8</sup> level of theory using a cc-pVTZ basis set for hydrogen<sup>9</sup> and a cc-pVTZ-PP basis set for lead.<sup>10</sup> The calculated energies for all calculated compounds are summarized in Table S4 and the xyz coordinates for all optimized molecular structures are given in Table S5. The NBO5.0 program as implemented in the Gaussian suite of programs was applied for the NBO analysis. The analysis was based on molecular structures obtained at the M06-2X/A optimized structures and densities obtained using the M06-2X functional in combination with Ahlrichs and Wigands def2-TZVP<sup>11</sup> basis sets and the corresponding effective core potentials (ECP) to realize a high accuracy with respect to the bonding situation of the heavy element lead. Orbital figures were calculated by ChemCraft 1.6<sup>12</sup> package and graphically arranged by GaussView.<sup>13</sup>

Binding energies, BE, were computed using the total energy of the complex and subtracting the total energies of its constituent molecules. The contribution of the dispersion forces to the overall binding energy was estimated by comparing the calculated binding energies BE obtained for the M06-2X optimized structures with that calculated with the B3LYP functional using the same molecular structure. The basis set superposition error (BSSE) was estimated using the counterpoise method from Boys and Bernardi.<sup>14</sup> The computed binding energies are given in Table S2.

Vertical singlet-triplet energy differences,  $\Delta E(\text{ST})$ , for plumblyenes PbH<sub>2</sub>, **5** and **6** were calculated at the M06-2X/A level and are summarized in Table S3.

The <sup>29</sup>Si nuclear magnetic shielding tensors of compounds **4**, **5** and **6** were computed by single point calculations at the B3LYP level using the GIAO-method<sup>15</sup> and molecular structures obtained at the M06-2X/A level of theory. For hydrogen, carbon and silicon atoms the 6-311+G(2d,p) basis set was used,<sup>4-6</sup> for lead atoms the def2-TZVP<sup>11</sup> basis and the corresponding ECP were used. Isotropic <sup>29</sup>Si NMR chemical shifts,  $\delta^{29}\text{Si}$ , were calculated using isotropic <sup>29</sup>Si

NMR shielding value of tetramethylsilane  $\sigma^{29}\text{Si}(\text{TMS})$  computed at the same level of theory. These results are summarized in Table S4.

Figures S5-S8 show the calculated LMOs of dimer **4** which are according to the NBO analysis involved in negative hyperconjugation (see Schemes 2 and S1) and show pictorially the contribution of negative hyperconjugation to the Pb(1) Pb(2) bond.

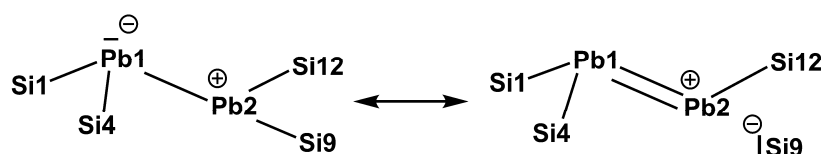

**Scheme S1.** Canonical structures which describe the negative hyperconjugation in dimer **4**.

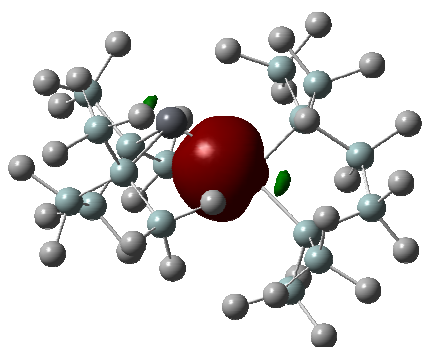

**Figure S5.** LMO describing the Pb(1)Pb(2)  $\sigma$ -bond.

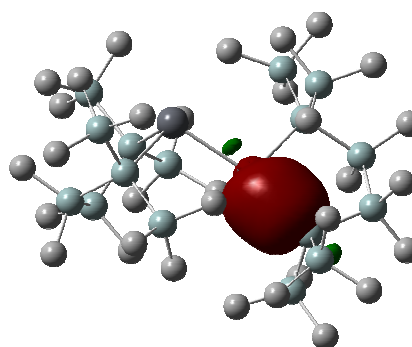

**Figure S6.** LMO describing the Pb(2)Si(9)  $\sigma$ -bond.

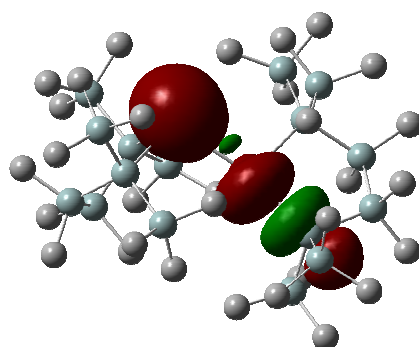

**Figure S7.** Illustration of the interaction of the lone pair at Pb(1) and  $\sigma^*$  -orbital of the Pb(2)Si(9) bond.

The dissociation of plumblylene dimer **4** into two plumblylene monomers **6** is enforced by entropy and solvation effects. The results of the computations at the M06-2X/A level suggests that in benzene solution dimer **4** and plumblylene **6** form complexes with the solvent, namely  $[4(\text{C}_6\text{H}_6)_2]$  and  $[6(\text{C}_6\text{H}_6)]$ . While the calculated total energies  $E^{\text{tot}}$  strongly favor the formation of the dimer solvate  $[4(\text{C}_6\text{H}_6)_2]$  (see Figure S8a), inspection of the relative Gibbs free enthalpies for these solvates reveals that at  $T=298\text{K}$  the free plumblylene **6** is the dominant species (see Figure S8b). Inclusion of solvation effects using a PCM model<sup>16</sup> into the calculation indicates that solvation further favors the formation of the plumblylene **6** in benzene solution (Figure S8c).

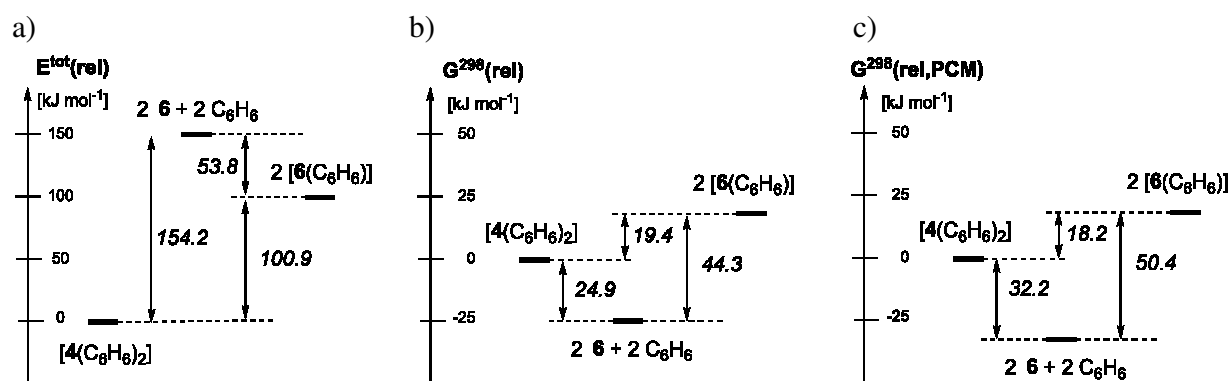

**Figure S8.** Calculated relative total energies  $E^{\text{tot}}(\text{rel})$  (a), relative Gibbs free enthalpies  $G^{298}(\text{rel})$  (b) and  $G^{298}(\text{rel})$  corrected for solvent effects (c), of plumblylene **6** and solvates  $[6(\text{C}_6\text{H}_6)]$  and  $[4(\text{C}_6\text{H}_6)_2]$ . (At M06-2X/A (a,b) and at PCM/M06-2X/A (c)).

**Table S2.** Calculated bond energies (BE) and Gibbs free energies at 298.15K ( $G^{298}$ ) for donor-acceptor complexes of plumbynes and related compounds (at M06-2X/SDD(Pb) 6-31G(d)(P, Si, F, C, B, H)).

| entry | compound                           | method         | BE [kJmol <sup>-1</sup> ] | $G^{298}$ [kJmol <sup>-1</sup> ] |
|-------|------------------------------------|----------------|---------------------------|----------------------------------|
| 1     | <b>4</b>                           | M06-2X//M06-2X | -110.8 <sup>b</sup>       | -22.3                            |
| 2     |                                    | B3LYP//M06-2X  | +1.0 <sup>c</sup>         | +89.5 <sup>a</sup>               |
| 3     |                                    | B3LYP//B3LYP   | -26.5 <sup>d</sup>        | +51.0                            |
| 4     | <b>7</b>                           | M06-2X//M06-2X | -76.4                     | +0.1                             |
| 5     |                                    | B3LYP//M06-2X  | -0.5                      | +77.1 <sup>a</sup>               |
| 6     |                                    | B3LYP//B3LYP   | -28.2                     | +48.4                            |
| 7     | <b>Pb<sub>2</sub>H<sub>6</sub></b> | M06-2X//M06-2X | -237.1                    | -179.9                           |
| 8     |                                    | B3LYP//M06-2X  | -202.2                    | -144.9 <sup>a</sup>              |
| 9     | <b>Pb<sub>2</sub>H<sub>4</sub></b> | M06-2X//M06-2X | -62.4                     | -15.6                            |
| 10    |                                    | B3LYP//M06-2X  | -54.4                     | -7.6 <sup>a</sup>                |
| 11    | <b>3</b>                           | M06-2X//M06-2X | -65.1                     | +14.2                            |
| 12    |                                    | B3LYP//M06-2X  | +48.6                     | +127.8                           |
| 13    | <b>2</b>                           | M06-2X//M06-2X | +76.0                     | +0.9                             |
| 14    |                                    | B3LYP//M06-2X  | -1.8                      | +75.1                            |

a) Correction terms for translation, rotation, and vibration energies taken from frequency analyses of optimized molecular structures at M06-2X level of theory  $G^{\text{corr}}$  ( $G = G^{\text{corr}}(\text{M06-2X}) + E^{\text{tot}}(\text{B3LYP})$ ).<sup>17</sup> b) Basis Set Superposition Error<sup>14</sup>  $E_{\text{BSSE}} = 18.7$  kJmol<sup>-1</sup>, c)  $E_{\text{BSSE}} = 14.4$  kJmol<sup>-1</sup>, d)  $E_{\text{BSSE}} = 21.4$  kJmol<sup>-1</sup>.



**Table S3.** Calculated vertical singlet-triplet energy differences  $\Delta E(\text{ST})$  of plumbylenes (at M06-2X/A//M06-2X/A).

| Entry | Compound                | $\Delta E(\text{ST})$ [a.u.] | $\Delta E(\text{ST})$ [ $\text{kJmol}^{-1}$ ] | $\alpha(\text{SiPbSi})$ [ $^\circ$ ] |
|-------|-------------------------|------------------------------|-----------------------------------------------|--------------------------------------|
| 1     | <b>6</b>                | -0.055367                    | -145.4                                        | 90.5                                 |
| 2     | <b>:PbH<sub>2</sub></b> | -0.082049                    | -215.4                                        | 90.9                                 |
| 3     | <b>5</b>                | -0.049106                    | -128.9                                        | 108.2                                |

**Table S4.** Calculated isotropic shieldings,  $\sigma^{\text{iso } ^{29}\text{Si}}$  and  $^{29}\text{Si}$  NMR chemical shifts,  $\delta^{29}\text{Si}$  for silylsubstituted plumbylenes (GIAO B3LYP/H,C,Si: 6-311+G(2d,p), Pb: def2-TZVP//M06-2X/A).

| Entry | Compound                | Core                                 | $\sigma^{\text{iso } ^{29}\text{Si}}$ | $\delta^{29}\text{Si}$ |
|-------|-------------------------|--------------------------------------|---------------------------------------|------------------------|
| 1     | <b>SiMe<sub>4</sub></b> | Si                                   | 328.61                                | 0                      |
| 2     | <b>4</b>                | Si(1)                                | 409.72                                | -81                    |
|       |                         | Si(4)                                | 429.87                                | -101                   |
|       |                         | $\alpha\text{-Si(Pb(1))}^{\text{a}}$ | 419.80                                | -91                    |
|       |                         | Si(9)                                | 353.35                                | -25                    |
|       |                         | Si(12)                               | 373.41                                | -45                    |
|       |                         | $\alpha\text{-Si(Pb(2))}^{\text{b}}$ | 363.38                                | -35                    |
| 3     | <b>6</b>                | Si(1) <sup>a</sup>                   | 365.57                                | -37                    |
|       |                         | Si(2)                                | 361.90                                | -33                    |
|       |                         | $\alpha\text{-Si(Pb)}^{\text{c}}$    | 363.74                                | -35                    |
| 4     | <b>5</b>                | Si(1)                                | 380.16                                | -52                    |
|       |                         | Si(2)                                | 390.34                                | -62                    |
|       |                         | $\alpha\text{-Si(Pb)}^{\text{c}}$    | 385.25                                | -57                    |

a) mean value from Si(1) and Si(4). b) mean value from Si(9) and Si(12). c) mean value from Si(1) and Si(2).

**Table S5.** Computed absolute energies,  $E^{\text{tot}}$ , free Gibbs enthalpies at 298.15K,  $G^{298}$ , zero point energies (ZPE) and number (NImag) and size of imaginary frequencies of plumblyenes and related compounds. The correction terms  $G^{\text{corr}}$  for translation, rotation and vibration energies are given in parentheses. The following basis sets were used : For B3LYP and M06-2X calculations Basis A; for CCSD calculation H cc-pVTZ, Pb cc-pVTZ-PP.

| Cpd.<br>(point group)                                           | method              | $E^{\text{tot}}$<br>[a.u.] | $G^{298}$<br>[a.u.]      | ZPE<br>[kJmol <sup>-1</sup> ] | NImag<br>[cm <sup>-1</sup> ] |
|-----------------------------------------------------------------|---------------------|----------------------------|--------------------------|-------------------------------|------------------------------|
| <b>2</b> ( $C_1$ )                                              | M06-2X              | -3536.41124                | -3535.68864<br>(0.72261) | 2142.669                      | 0                            |
|                                                                 | B3LYP//M06-2X       | -3537.24848                | -3536.52587 <sup>a</sup> |                               |                              |
| <b>3</b> ( $C_1$ )                                              | M06-2X              | -5165.05982                | -5164.40523<br>(0.65460) | 2023.212                      | 0                            |
|                                                                 | B3LYP//M06-2X       | -2208.22775                | -2208.12988 <sup>a</sup> |                               |                              |
| <b>4</b> ( $C_1$ )                                              | M06-2X              | -5915.10082                | -5914.01402<br>(1.08681) | 3212.363                      | 0                            |
|                                                                 | B3LYP//M06-2X       | -5916.43210                | -5915.34529 <sup>a</sup> |                               |                              |
|                                                                 | B3LYP               | -5916.45467                | -5915.38263              | 3190.573                      | 0                            |
|                                                                 | scrf M06-2X//M06-2X | -5915.10323                | -5914.01643 <sup>b</sup> |                               |                              |
| <b>[4(C<sub>6</sub>H<sub>6</sub>)<sub>2</sub>]</b><br>( $C_1$ ) | M06-2X              | -6379.39029                | -6378.11590<br>(1.27439) | 3748.733                      | 0                            |
|                                                                 | scrf M06-2X//M06-2X | -6379.39392                | -6378.11952 <sup>b</sup> |                               |                              |
| <b>7</b> ( $C_1$ )                                              | M06-2X              | -5915.08773                | -5914.00549<br>(1.08224) | 3209.628                      | 0                            |
|                                                                 | B3LYP//M06-2X       | -5916.43226                | -5915.35002 <sup>a</sup> |                               |                              |
|                                                                 | B3LYP               | -5916.45532                | -5915.38362              | 3192.179                      | 0                            |
| <b>6<sup>1</sup>A</b> ( $C_1$ )                                 | M06-2X              | -2957.52931                | -2957.00277<br>(0.52654) | 1601.354                      | 0                            |
|                                                                 | B3LYP//M06-2X       | -2958.21623                | -2957.68969              |                               |                              |
|                                                                 | B3LPY               | -2958.22228                | -2957.70102              | 1592.202                      | 0                            |
|                                                                 | scrf M06-2X//M06-2X | -2957.53119                | -2957.00465 <sup>b</sup> |                               |                              |
| <b>6<sup>3</sup>A</b> ( $C_1$ )                                 | M06-2X//M06-2X      | -2957.47394                |                          |                               |                              |

|                                                                  |                      |              |                           |          |   |
|------------------------------------------------------------------|----------------------|--------------|---------------------------|----------|---|
| <b>[6(C<sub>6</sub>H<sub>6</sub>)] (C<sub>1</sub>)</b>           | M06-2X               | -3189.67594  | -3189.05426<br>(0.62168)  | 1873.191 | 0 |
|                                                                  | scrfl M06-2X//M06-2X | -3189.67797  | -3189.05629 <sup>b</sup>  |          |   |
| <b>Pb<sub>2</sub>H<sub>4</sub> (C<sub>2h</sub>)</b>              | M06-2X               | -9.14487     | -9.15481<br>(-0.00994)    | 58.779   | 0 |
|                                                                  | B3LYP//M06-2X        | -9.21481     | -9.22475 <sup>a</sup>     |          |   |
|                                                                  | CCSD                 | -386.40648   | -386.41598<br>(-0.00950)  | 59.630   | 0 |
| <b>Pb<sub>2</sub>H<sub>6</sub> (D<sub>3d</sub>)</b>              | M06-2X               | -10.31616    | -10.30913<br>(0.00703)    | 100.808  | 0 |
|                                                                  | B3LYP//M06-2X        | -10.39596    | -10.38893                 |          |   |
|                                                                  | CCSD                 | -387.58826   | -387.58208<br>(0.00618)   | 101.449  | 0 |
| <b>:PbH<sub>2</sub><sup>1</sup>A (C<sub>2v</sub>)</b>            | M06-2X               | -4.56055     | -4.57444<br>(-0.01389)    | 24.129   | 0 |
|                                                                  | B3LYP//M06-2X        | -4.59704     | -4.61093 <sup>a</sup>     |          |   |
| <b>:PbH<sub>2</sub><sup>3</sup>B (C<sub>2v</sub>)</b>            | M06-2X//M06-2X       | -4.47850     |                           |          |   |
| <b>5<sup>1</sup>A (C<sub>1</sub>)</b>                            | M06-2X               | -3037.31234  | -3036.71567<br>(0.59667)  | 300.729  | 0 |
| <b>5<sup>3</sup>A (C<sub>1</sub>)</b>                            | M06-2X//M06-2X       | -3037.26324  |                           |          |   |
| <b>PEt<sub>3</sub> (C<sub>3</sub>)</b>                           | M06-2X               | -578.85300   | -578.68621<br>(0.16679)   | 529.527  | 0 |
|                                                                  | B3LYP//M06-2X        | -579.03156   | -578.86477 <sup>a</sup>   |          |   |
| <b>B(C<sub>6</sub>F<sub>5</sub>)<sub>3</sub> (C<sub>3</sub>)</b> | M06-2X               | -2207.50572  | -2207.40785<br>(0.09787)  | 413.918  | 0 |
|                                                                  | B3LYP//M06-2X        | -2208.22775  | -2208.12988 <sup>a</sup>  |          |   |
| <b>SiMe<sub>4</sub> (T<sub>d</sub>)</b>                          | M06-2X               | -449.04694   | -448.92740                | 392.925  | 0 |
| <b>C<sub>6</sub>H<sub>6</sub> (D<sub>6h</sub>)</b>               | M06-2X               | -232.1364659 | -232.059929<br>(0.076537) | 266.859  | 0 |
|                                                                  | scrfl M06-2X//M06-2X | -232.1377824 | -232.061245 <sup>b</sup>  |          |   |

a)  $G(\text{B3LYP//M06-2X}) = G^{\text{corr}}(\text{M06-2X}) + E^{\text{tot}}(\text{B3LYP})^{17}$

b)  $G(\text{scrfl M06-2X//M06-2X}) = G^{\text{corr}}(\text{M06-2X}) + E^{\text{tot}}(\text{scrfl M06-2X//M06-2X})$

**Table S6.** Cartesian coordinates for all optimized molecular structures  
**Compound 2.** M06-2X / H, C, Si, P: 6-31G(d); Pb: SDD C<sub>1</sub>

| Center<br>Number | Atomic<br>Number | Atomic<br>Type | Coordinates (Angstroms) |           |           |
|------------------|------------------|----------------|-------------------------|-----------|-----------|
|                  |                  |                | X                       | Y         | Z         |
| 1                | 14               | 0              | 2.098844                | -0.416232 | 0.166777  |
| 2                | 14               | 0              | 1.306208                | -2.409606 | 1.119829  |
| 3                | 14               | 0              | -0.852065               | -1.981242 | 1.918654  |
| 4                | 14               | 0              | -1.910516               | -0.842877 | 0.138764  |
| 5                | 14               | 0              | 3.309339                | 0.726833  | 1.825842  |
| 6                | 14               | 0              | 3.720899                | -1.073766 | -1.397543 |
| 7                | 14               | 0              | -2.773245               | -2.405379 | -1.421755 |
| 8                | 14               | 0              | -3.811017               | 0.176800  | 1.077374  |
| 9                | 6                | 0              | 1.066413                | -3.710944 | -0.254840 |
| 10               | 1                | 0              | 2.008587                | -3.957799 | -0.756355 |
| 11               | 1                | 0              | 0.366374                | -3.348190 | -1.017304 |
| 12               | 1                | 0              | 0.653458                | -4.637860 | 0.161599  |
| 13               | 6                | 0              | 2.479562                | -3.171749 | 2.413109  |
| 14               | 1                | 0              | 2.059399                | -4.100628 | 2.815377  |
| 15               | 1                | 0              | 2.659715                | -2.491977 | 3.252366  |
| 16               | 1                | 0              | 3.449127                | -3.408305 | 1.959278  |
| 17               | 6                | 0              | -0.808376               | -0.874063 | 3.468928  |
| 18               | 1                | 0              | -1.809234               | -0.782581 | 3.906343  |
| 19               | 1                | 0              | -0.436612               | 0.130680  | 3.242393  |
| 20               | 1                | 0              | -0.150683               | -1.308630 | 4.230893  |
| 21               | 6                | 0              | -1.684784               | -3.603569 | 2.473544  |
| 22               | 1                | 0              | -1.229918               | -3.940522 | 3.412711  |
| 23               | 1                | 0              | -1.562482               | -4.399641 | 1.734358  |
| 24               | 1                | 0              | -2.757965               | -3.469014 | 2.647374  |
| 25               | 6                | 0              | 3.743960                | 2.511636  | 1.337550  |
| 26               | 1                | 0              | 4.122213                | 2.563142  | 0.310574  |
| 27               | 1                | 0              | 4.522790                | 2.901679  | 2.003567  |
| 28               | 1                | 0              | 2.882508                | 3.183540  | 1.415280  |
| 29               | 6                | 0              | 2.456977                | 0.786879  | 3.520606  |
| 30               | 1                | 0              | 3.144427                | 1.221052  | 4.256760  |
| 31               | 1                | 0              | 2.189234                | -0.217336 | 3.866068  |
| 32               | 1                | 0              | 1.542428                | 1.387719  | 3.524416  |
| 33               | 6                | 0              | 4.962493                | -0.158908 | 2.113060  |
| 34               | 1                | 0              | 5.605490                | -0.111833 | 1.227729  |
| 35               | 1                | 0              | 4.812899                | -1.214096 | 2.365192  |
| 36               | 1                | 0              | 5.500095                | 0.316125  | 2.942783  |
| 37               | 6                | 0              | 4.813020                | 0.400282  | -1.888040 |
| 38               | 1                | 0              | 5.415995                | 0.758507  | -1.045985 |
| 39               | 1                | 0              | 4.198187                | 1.237157  | -2.239312 |
| 40               | 1                | 0              | 5.499696                | 0.125014  | -2.697100 |
| 41               | 6                | 0              | 4.851290                | -2.469025 | -0.785403 |
| 42               | 1                | 0              | 4.275653                | -3.368699 | -0.541781 |
| 43               | 1                | 0              | 5.411407                | -2.180656 | 0.109187  |
| 44               | 1                | 0              | 5.574238                | -2.737754 | -1.565262 |
| 45               | 6                | 0              | 2.877100                | -1.693293 | -2.979951 |
| 46               | 1                | 0              | 3.621187                | -2.078106 | -3.687379 |
| 47               | 1                | 0              | 2.327859                | -0.887452 | -3.479660 |
| 48               | 1                | 0              | 2.167516                | -2.501454 | -2.769748 |
| 49               | 6                | 0              | -1.733873               | -2.425458 | -3.012526 |
| 50               | 1                | 0              | -2.096379               | -3.214006 | -3.682970 |
| 51               | 1                | 0              | -0.669178               | -2.612073 | -2.831277 |
| 52               | 1                | 0              | -1.816574               | -1.472111 | -3.546518 |
| 53               | 6                | 0              | -2.852471               | -4.186764 | -0.781845 |
| 54               | 1                | 0              | -3.441954               | -4.264480 | 0.137672  |
| 55               | 1                | 0              | -1.852908               | -4.584486 | -0.576500 |
| 56               | 1                | 0              | -3.318118               | -4.827866 | -1.540312 |
| 57               | 6                | 0              | -4.526457               | -1.938064 | -1.974883 |
| 58               | 1                | 0              | -4.554267               | -0.930641 | -2.403282 |
| 59               | 1                | 0              | -5.242164               | -1.972182 | -1.146467 |
| 60               | 1                | 0              | -4.870141               | -2.641147 | -2.743055 |
| 61               | 6                | 0              | -4.808187               | -1.177523 | 1.955590  |
| 62               | 1                | 0              | -5.767756               | -0.791024 | 2.319212  |
| 63               | 1                | 0              | -4.248436               | -1.554644 | 2.819615  |
| 64               | 1                | 0              | -5.010907               | -2.028522 | 1.295841  |
| 65               | 6                | 0              | -4.935270               | 1.032156  | -0.197783 |

|    |    |   |           |          |           |
|----|----|---|-----------|----------|-----------|
| 66 | 1  | 0 | -5.634052 | 0.322556 | -0.649698 |
| 67 | 1  | 0 | -4.367285 | 1.496709 | -1.011444 |
| 68 | 1  | 0 | -5.526312 | 1.815948 | 0.291533  |
| 69 | 6  | 0 | -3.470294 | 1.486340 | 2.418160  |
| 70 | 1  | 0 | -3.114340 | 2.436181 | 2.006395  |
| 71 | 1  | 0 | -2.746452 | 1.153239 | 3.168196  |
| 72 | 1  | 0 | -4.415076 | 1.693432 | 2.936405  |
| 73 | 82 | 0 | -0.005008 | 0.466302 | -1.460184 |
| 74 | 15 | 0 | -0.384272 | 2.893549 | -0.152748 |
| 75 | 6  | 0 | -2.054112 | 3.577101 | -0.578929 |
| 76 | 1  | 0 | -2.776065 | 3.002221 | 0.011818  |
| 77 | 1  | 0 | -2.236526 | 3.292431 | -1.622496 |
| 78 | 6  | 0 | -0.234180 | 2.843859 | 1.683662  |
| 79 | 1  | 0 | 0.814356  | 2.573904 | 1.853966  |
| 80 | 1  | 0 | -0.820899 | 1.975485 | 2.004896  |
| 81 | 6  | 0 | -0.610504 | 4.083643 | 2.492785  |
| 82 | 1  | 0 | -0.331906 | 3.940286 | 3.541547  |
| 83 | 1  | 0 | -0.097993 | 4.981168 | 2.131828  |
| 84 | 1  | 0 | -1.688119 | 4.267770 | 2.463152  |
| 85 | 6  | 0 | -2.267848 | 5.081484 | -0.402904 |
| 86 | 1  | 0 | -1.613805 | 5.659348 | -1.062717 |
| 87 | 1  | 0 | -3.300428 | 5.342340 | -0.653301 |
| 88 | 1  | 0 | -2.079913 | 5.408022 | 0.622114  |
| 89 | 6  | 0 | 0.788352  | 4.213664 | -0.693880 |
| 90 | 1  | 0 | 0.546138  | 5.155919 | -0.188335 |
| 91 | 1  | 0 | 1.784452  | 3.908293 | -0.356259 |
| 92 | 6  | 0 | 0.782788  | 4.391156 | -2.213601 |
| 93 | 1  | 0 | 1.478858  | 5.180149 | -2.511151 |
| 94 | 1  | 0 | 1.083685  | 3.466221 | -2.715343 |
| 95 | 1  | 0 | -0.210237 | 4.662988 | -2.586712 |

-----

**Compound 3. M06-2X / H, C, Si, F, B: 6-31G(d); Pb: SDD C<sub>1</sub>**

| Center Number | Atomic Number | Atomic Type | Coordinates (Angstroms) |           |           |
|---------------|---------------|-------------|-------------------------|-----------|-----------|
|               |               |             | X                       | Y         | Z         |
| 1             | 14            | 0           | 2.212028                | 1.956909  | 0.168510  |
| 2             | 14            | 0           | 4.283748                | 0.904548  | -0.178607 |
| 3             | 14            | 0           | 4.115542                | -1.313292 | 0.567061  |
| 4             | 14            | 0           | 2.103326                | -2.238219 | -0.236627 |
| 5             | 14            | 0           | 1.814869                | 2.885471  | 2.303307  |
| 6             | 14            | 0           | 1.942202                | 3.676787  | -1.415612 |
| 7             | 14            | 0           | 1.974175                | -2.616387 | -2.558193 |
| 8             | 14            | 0           | 1.529372                | -4.035176 | 1.183412  |
| 9             | 6             | 0           | 4.615684                | 0.872248  | -2.051554 |
| 10            | 1             | 0           | 4.728347                | 1.880624  | -2.463365 |
| 11            | 1             | 0           | 3.792088                | 0.384231  | -2.586473 |
| 12            | 1             | 0           | 5.534080                | 0.314509  | -2.269596 |
| 13            | 6             | 0           | 5.706530                | 1.821828  | 0.686487  |
| 14            | 1             | 0           | 6.664762                | 1.325427  | 0.496346  |
| 15            | 1             | 0           | 5.554639                | 1.858136  | 1.770698  |
| 16            | 1             | 0           | 5.781567                | 2.852215  | 0.321517  |
| 17            | 6             | 0           | 3.980469                | -1.255981 | 2.463283  |
| 18            | 1             | 0           | 3.946479                | -2.253937 | 2.910925  |
| 19            | 1             | 0           | 3.069147                | -0.727115 | 2.762711  |
| 20            | 1             | 0           | 4.833659                | -0.722480 | 2.898556  |
| 21            | 6             | 0           | 5.651671                | -2.313850 | 0.065645  |
| 22            | 1             | 0           | 6.554959                | -1.868837 | 0.498029  |
| 23            | 1             | 0           | 5.771455                | -2.335730 | -1.022328 |
| 24            | 1             | 0           | 5.581311                | -3.347591 | 0.419955  |
| 25            | 6             | 0           | -0.021803               | 3.273198  | 2.538043  |
| 26            | 1             | 0           | -0.379715               | 4.022401  | 1.825159  |
| 27            | 1             | 0           | -0.177804               | 3.676243  | 3.546090  |
| 28            | 1             | 0           | -0.657161               | 2.385505  | 2.439001  |
| 29            | 6             | 0           | 2.364769                | 1.781201  | 3.732917  |
| 30            | 1             | 0           | 2.264523                | 2.339334  | 4.671667  |
| 31            | 1             | 0           | 3.410767                | 1.472689  | 3.638102  |
| 32            | 1             | 0           | 1.745997                | 0.882198  | 3.816287  |
| 33            | 6             | 0           | 2.806813                | 4.494218  | 2.390940  |
| 34            | 1             | 0           | 2.474644                | 5.210338  | 1.632182  |
| 35            | 1             | 0           | 3.874883                | 4.307477  | 2.234195  |

|     |    |   |           |           |           |
|-----|----|---|-----------|-----------|-----------|
| 36  | 1  | 0 | 2.685987  | 4.965027  | 3.373489  |
| 37  | 6  | 0 | 0.548309  | 4.825043  | -0.851572 |
| 38  | 1  | 0 | 0.924729  | 5.578154  | -0.150850 |
| 39  | 1  | 0 | -0.233697 | 4.258692  | -0.339440 |
| 40  | 1  | 0 | 0.086886  | 5.348899  | -1.697401 |
| 41  | 6  | 0 | 3.553836  | 4.670302  | -1.475853 |
| 42  | 1  | 0 | 4.400503  | 4.054621  | -1.797135 |
| 43  | 1  | 0 | 3.798950  | 5.090114  | -0.494231 |
| 44  | 1  | 0 | 3.458587  | 5.502375  | -2.183474 |
| 45  | 6  | 0 | 1.593006  | 2.988785  | -3.138274 |
| 46  | 1  | 0 | 1.465351  | 3.810098  | -3.853004 |
| 47  | 1  | 0 | 0.683143  | 2.383233  | -3.166776 |
| 48  | 1  | 0 | 2.427994  | 2.368999  | -3.483425 |
| 49  | 6  | 0 | 1.041530  | -1.164858 | -3.355200 |
| 50  | 1  | 0 | 1.061708  | -1.246180 | -4.448448 |
| 51  | 1  | 0 | 1.470551  | -0.184953 | -3.103179 |
| 52  | 1  | 0 | -0.016564 | -1.164576 | -3.057396 |
| 53  | 6  | 0 | 3.688629  | -2.774523 | -3.336112 |
| 54  | 1  | 0 | 4.240241  | -3.605515 | -2.883471 |
| 55  | 1  | 0 | 4.283552  | -1.864599 | -3.205458 |
| 56  | 1  | 0 | 3.604616  | -2.970488 | -4.411356 |
| 57  | 6  | 0 | 0.993026  | -4.188573 | -2.916062 |
| 58  | 1  | 0 | 0.048852  | -4.226101 | -2.362486 |
| 59  | 1  | 0 | 1.569483  | -5.079788 | -2.647011 |
| 60  | 1  | 0 | 0.762507  | -4.250109 | -3.986183 |
| 61  | 6  | 0 | 3.152211  | -4.903416 | 1.635953  |
| 62  | 1  | 0 | 2.946194  | -5.744286 | 2.308859  |
| 63  | 1  | 0 | 3.875057  | -4.248473 | 2.130046  |
| 64  | 1  | 0 | 3.627325  | -5.307466 | 0.734760  |
| 65  | 6  | 0 | 0.441700  | -5.365801 | 0.412012  |
| 66  | 1  | 0 | 0.938921  | -5.846121 | -0.435921 |
| 67  | 1  | 0 | -0.522198 | -4.983865 | 0.074216  |
| 68  | 1  | 0 | 0.255006  | -6.138817 | 1.167813  |
| 69  | 6  | 0 | 0.682755  | -3.353928 | 2.729161  |
| 70  | 1  | 0 | -0.314611 | -2.982621 | 2.469126  |
| 71  | 1  | 0 | 1.244866  | -2.533700 | 3.186598  |
| 72  | 1  | 0 | 0.561901  | -4.144408 | 3.478661  |
| 73  | 82 | 0 | 0.485697  | -0.087026 | -0.100452 |
| 74  | 6  | 0 | -2.285568 | -0.255543 | 1.585565  |
| 75  | 6  | 0 | -3.623196 | -0.449421 | 1.932660  |
| 76  | 6  | 0 | -1.397357 | -0.425059 | 2.635715  |
| 77  | 6  | 0 | -4.043234 | -0.803812 | 3.205539  |
| 78  | 6  | 0 | -1.759028 | -0.786232 | 3.926262  |
| 79  | 6  | 0 | -3.100350 | -0.979494 | 4.212609  |
| 80  | 6  | 0 | -2.529498 | -1.018857 | -0.974875 |
| 81  | 6  | 0 | -3.391819 | -0.776478 | -2.046099 |
| 82  | 6  | 0 | -2.195895 | -2.364302 | -0.806079 |
| 83  | 6  | 0 | -3.846909 | -1.769519 | -2.907214 |
| 84  | 6  | 0 | -2.628019 | -3.384027 | -1.639202 |
| 85  | 6  | 0 | -3.460819 | -3.084568 | -2.707733 |
| 86  | 6  | 0 | -2.204873 | 1.636692  | -0.403631 |
| 87  | 6  | 0 | -2.825155 | 2.617920  | 0.365407  |
| 88  | 6  | 0 | -1.810173 | 2.061530  | -1.674085 |
| 89  | 6  | 0 | -3.059943 | 3.911378  | -0.096874 |
| 90  | 6  | 0 | -2.022056 | 3.330563  | -2.175949 |
| 91  | 6  | 0 | -2.664000 | 4.267598  | -1.375372 |
| 92  | 9  | 0 | -4.568535 | -0.262740 | 1.005905  |
| 93  | 9  | 0 | -5.333714 | -0.969910 | 3.477992  |
| 94  | 9  | 0 | -3.484546 | -1.323120 | 5.436202  |
| 95  | 9  | 0 | -0.831188 | -0.946433 | 4.866928  |
| 96  | 9  | 0 | -0.052599 | -0.248455 | 2.453368  |
| 97  | 9  | 0 | -1.386771 | -2.727008 | 0.209833  |
| 98  | 9  | 0 | -2.246805 | -4.646958 | -1.433057 |
| 99  | 9  | 0 | -3.886121 | -4.047091 | -3.518038 |
| 100 | 9  | 0 | -4.662132 | -1.464037 | -3.913310 |
| 101 | 9  | 0 | -3.848010 | 0.453231  | -2.303990 |
| 102 | 9  | 0 | -1.173095 | 1.182070  | -2.477523 |
| 103 | 9  | 0 | -1.578851 | 3.680145  | -3.383514 |
| 104 | 9  | 0 | -2.839019 | 5.508778  | -1.816730 |
| 105 | 9  | 0 | -3.656523 | 4.807144  | 0.686079  |
| 106 | 9  | 0 | -3.239839 | 2.359848  | 1.611693  |
| 107 | 5  | 0 | -1.960590 | 0.109722  | 0.035938  |

**Compound 4. M06-2X / H, C, Si: 6-31G(d); Pb: SDD C<sub>1</sub>**

| Center<br>Number | Atomic<br>Number | Atomic<br>Type | Coordinates (Angstroms) |           |           |
|------------------|------------------|----------------|-------------------------|-----------|-----------|
|                  |                  |                | X                       | Y         | Z         |
| 1                | 82               | 0              | 1.715241                | 0.407122  | -1.196570 |
| 2                | 82               | 0              | -1.100831               | -0.076484 | 0.003705  |
| 3                | 14               | 0              | 2.682694                | 1.708580  | 1.086738  |
| 4                | 14               | 0              | 3.654311                | 0.060030  | 2.456284  |
| 5                | 14               | 0              | 4.618990                | -1.609718 | 1.119133  |
| 6                | 14               | 0              | 3.121980                | -1.924239 | -0.661795 |
| 7                | 14               | 0              | 1.254259                | 2.924215  | 2.503570  |
| 8                | 14               | 0              | 4.276145                | 3.288208  | 0.397804  |
| 9                | 14               | 0              | 4.312094                | -2.405647 | -2.626854 |
| 10               | 14               | 0              | 1.747930                | -3.773869 | -0.269039 |
| 11               | 14               | 0              | -3.242545               | -1.600739 | 0.865384  |
| 12               | 14               | 0              | -5.216814               | -0.447473 | 0.274795  |
| 13               | 14               | 0              | -4.722856               | 1.828332  | 0.027547  |
| 14               | 14               | 0              | -2.647614               | 1.896825  | -1.060021 |
| 15               | 14               | 0              | -3.112074               | -1.682810 | 3.222528  |
| 16               | 14               | 0              | -3.525669               | -3.817550 | 0.104941  |
| 17               | 14               | 0              | -2.732479               | 1.007492  | -3.245984 |
| 18               | 14               | 0              | -1.824679               | 4.085561  | -1.215355 |
| 19               | 6                | 0              | 4.930020                | 0.742111  | 3.696225  |
| 20               | 1                | 0              | 4.506238                | 1.525641  | 4.332477  |
| 21               | 1                | 0              | 5.789205                | 1.166261  | 3.164413  |
| 22               | 1                | 0              | 5.301443                | -0.059779 | 4.345142  |
| 23               | 6                | 0              | 2.216906                | -0.765373 | 3.397309  |
| 24               | 1                | 0              | 2.555170                | -1.627769 | 3.983716  |
| 25               | 1                | 0              | 1.476733                | -1.126801 | 2.672446  |
| 26               | 1                | 0              | 1.710621                | -0.071420 | 4.078229  |
| 27               | 6                | 0              | 6.331186                | -1.068024 | 0.488055  |
| 28               | 1                | 0              | 6.945042                | -0.678064 | 1.308767  |
| 29               | 1                | 0              | 6.258470                | -0.292054 | -0.277702 |
| 30               | 1                | 0              | 6.861252                | -1.922605 | 0.053786  |
| 31               | 6                | 0              | 4.931836                | -3.185952 | 2.144520  |
| 32               | 1                | 0              | 5.602111                | -2.968014 | 2.984179  |
| 33               | 1                | 0              | 5.413803                | -3.947374 | 1.520414  |
| 34               | 1                | 0              | 4.012207                | -3.617237 | 2.550511  |
| 35               | 6                | 0              | -0.450916               | 2.098498  | 2.696612  |
| 36               | 1                | 0              | -1.009382               | 2.540908  | 3.531465  |
| 37               | 1                | 0              | -0.342309               | 1.023620  | 2.900725  |
| 38               | 1                | 0              | -1.056864               | 2.241706  | 1.790386  |
| 39               | 6                | 0              | 0.969945                | 4.712644  | 1.946790  |
| 40               | 1                | 0              | 0.260689                | 5.203517  | 2.624853  |
| 41               | 1                | 0              | 0.566091                | 4.783031  | 0.933205  |
| 42               | 1                | 0              | 1.905128                | 5.282364  | 1.975549  |
| 43               | 6                | 0              | 2.017124                | 3.041579  | 4.236754  |
| 44               | 1                | 0              | 3.010867                | 3.500058  | 4.188702  |
| 45               | 1                | 0              | 2.124891                | 2.063171  | 4.715627  |
| 46               | 1                | 0              | 1.387962                | 3.666280  | 4.881952  |
| 47               | 6                | 0              | 5.769532                | 2.451136  | -0.406930 |
| 48               | 1                | 0              | 5.470106                | 1.790092  | -1.228829 |
| 49               | 1                | 0              | 6.320654                | 1.851748  | 0.325403  |
| 50               | 1                | 0              | 6.457223                | 3.202152  | -0.813020 |
| 51               | 6                | 0              | 4.926726                | 4.286818  | 1.873782  |
| 52               | 1                | 0              | 5.704897                | 4.984997  | 1.542655  |
| 53               | 1                | 0              | 5.365627                | 3.628895  | 2.631968  |
| 54               | 1                | 0              | 4.137950                | 4.873139  | 2.356610  |
| 55               | 6                | 0              | 3.537210                | 4.489052  | -0.865278 |
| 56               | 1                | 0              | 2.713109                | 5.070707  | -0.439629 |
| 57               | 1                | 0              | 3.148186                | 3.953813  | -1.738940 |
| 58               | 1                | 0              | 4.304466                | 5.191497  | -1.211836 |
| 59               | 6                | 0              | 3.121521                | -3.053705 | -3.952774 |
| 60               | 1                | 0              | 2.670338                | -4.005612 | -3.650360 |
| 61               | 1                | 0              | 3.648114                | -3.219280 | -4.899886 |
| 62               | 1                | 0              | 2.309600                | -2.341285 | -4.138906 |
| 63               | 6                | 0              | 5.136682                | -0.840068 | -3.308097 |
| 64               | 1                | 0              | 5.878373                | -0.444552 | -2.606128 |
| 65               | 1                | 0              | 4.399110                | -0.051466 | -3.499743 |
| 66               | 1                | 0              | 5.650705                | -1.051672 | -4.253016 |

|     |   |   |           |           |           |
|-----|---|---|-----------|-----------|-----------|
| 67  | 6 | 0 | 5.661312  | -3.711433 | -2.367751 |
| 68  | 1 | 0 | 6.409556  | -3.372028 | -1.644235 |
| 69  | 1 | 0 | 6.177972  | -3.916573 | -3.313081 |
| 70  | 1 | 0 | 5.243629  | -4.653703 | -1.999072 |
| 71  | 6 | 0 | 1.061755  | -3.743144 | 1.497466  |
| 72  | 1 | 0 | 0.274937  | -2.982335 | 1.579584  |
| 73  | 1 | 0 | 1.831976  | -3.499166 | 2.235215  |
| 74  | 1 | 0 | 0.623317  | -4.708033 | 1.777577  |
| 75  | 6 | 0 | 2.689895  | -5.396934 | -0.529654 |
| 76  | 1 | 0 | 2.061345  | -6.255646 | -0.265309 |
| 77  | 1 | 0 | 3.594666  | -5.434693 | 0.086408  |
| 78  | 1 | 0 | 2.991811  | -5.512727 | -1.576647 |
| 79  | 6 | 0 | 0.263056  | -3.763672 | -1.455451 |
| 80  | 1 | 0 | -0.238105 | -4.739114 | -1.475745 |
| 81  | 1 | 0 | 0.555371  | -3.511370 | -2.480211 |
| 82  | 1 | 0 | -0.476088 | -3.020965 | -1.125345 |
| 83  | 6 | 0 | -5.899070 | -1.053558 | -1.398978 |
| 84  | 1 | 0 | -6.193847 | -2.107566 | -1.361341 |
| 85  | 1 | 0 | -5.169779 | -0.938524 | -2.207230 |
| 86  | 1 | 0 | -6.788049 | -0.469382 | -1.666126 |
| 87  | 6 | 0 | -6.591738 | -0.737620 | 1.560783  |
| 88  | 1 | 0 | -7.485838 | -0.163733 | 1.290484  |
| 89  | 1 | 0 | -6.286071 | -0.430642 | 2.566107  |
| 90  | 1 | 0 | -6.871576 | -1.796514 | 1.600362  |
| 91  | 6 | 0 | -4.594626 | 2.676481  | 1.726504  |
| 92  | 1 | 0 | -4.582144 | 3.765274  | 1.613699  |
| 93  | 1 | 0 | -3.685648 | 2.384885  | 2.262297  |
| 94  | 1 | 0 | -5.454766 | 2.415217  | 2.354004  |
| 95  | 6 | 0 | -6.112403 | 2.703217  | -0.934332 |
| 96  | 1 | 0 | -7.059289 | 2.632703  | -0.386487 |
| 97  | 1 | 0 | -6.259859 | 2.267638  | -1.927002 |
| 98  | 1 | 0 | -5.879372 | 3.766184  | -1.063159 |
| 99  | 6 | 0 | -1.402927 | -2.229626 | 3.813404  |
| 100 | 1 | 0 | -1.136342 | -3.223190 | 3.438677  |
| 101 | 1 | 0 | -1.385089 | -2.265141 | 4.909349  |
| 102 | 1 | 0 | -0.618669 | -1.534277 | 3.493173  |
| 103 | 6 | 0 | -3.456724 | 0.018286  | 3.972009  |
| 104 | 1 | 0 | -3.433501 | -0.047571 | 5.066456  |
| 105 | 1 | 0 | -4.433102 | 0.415722  | 3.677379  |
| 106 | 1 | 0 | -2.695457 | 0.744451  | 3.667222  |
| 107 | 6 | 0 | -4.379079 | -2.906384 | 3.918711  |
| 108 | 1 | 0 | -4.143944 | -3.935208 | 3.625835  |
| 109 | 1 | 0 | -5.397202 | -2.681014 | 3.585412  |
| 110 | 1 | 0 | -4.363896 | -2.860417 | 5.014340  |
| 111 | 6 | 0 | -2.296963 | -4.990875 | 0.925751  |
| 112 | 1 | 0 | -2.358595 | -4.932568 | 2.018420  |
| 113 | 1 | 0 | -1.271453 | -4.752857 | 0.633759  |
| 114 | 1 | 0 | -2.505877 | -6.026092 | 0.630762  |
| 115 | 6 | 0 | -5.270862 | -4.346377 | 0.627444  |
| 116 | 1 | 0 | -6.042309 | -3.741415 | 0.140047  |
| 117 | 1 | 0 | -5.417850 | -4.270662 | 1.708634  |
| 118 | 1 | 0 | -5.436261 | -5.391062 | 0.336275  |
| 119 | 6 | 0 | -3.441116 | -4.026270 | -1.772473 |
| 120 | 1 | 0 | -3.602924 | -5.083878 | -2.015243 |
| 121 | 1 | 0 | -2.476680 | -3.727572 | -2.192871 |
| 122 | 1 | 0 | -4.225637 | -3.447575 | -2.272076 |
| 123 | 6 | 0 | -2.448085 | -0.870890 | -3.187410 |
| 124 | 1 | 0 | -2.695664 | -1.342515 | -4.146198 |
| 125 | 1 | 0 | -3.042601 | -1.367866 | -2.413130 |
| 126 | 1 | 0 | -1.387618 | -1.089339 | -2.992295 |
| 127 | 6 | 0 | -4.374794 | 1.388178  | -4.103443 |
| 128 | 1 | 0 | -4.564208 | 2.467343  | -4.110201 |
| 129 | 1 | 0 | -5.218411 | 0.902558  | -3.602858 |
| 130 | 1 | 0 | -4.352262 | 1.040173  | -5.142865 |
| 131 | 6 | 0 | -1.330214 | 1.717012  | -4.298547 |
| 132 | 1 | 0 | -0.352884 | 1.487728  | -3.857835 |
| 133 | 1 | 0 | -1.403143 | 2.803128  | -4.413147 |
| 134 | 1 | 0 | -1.358831 | 1.271459  | -5.300209 |
| 135 | 6 | 0 | -2.760744 | 4.992757  | -2.592016 |
| 136 | 1 | 0 | -2.433306 | 6.037578  | -2.651517 |
| 137 | 1 | 0 | -3.838655 | 4.989253  | -2.395640 |
| 138 | 1 | 0 | -2.599281 | 4.535278  | -3.573246 |
| 139 | 6 | 0 | 0.021386  | 4.098597  | -1.619220 |



|     |   |   |           |          |           |
|-----|---|---|-----------|----------|-----------|
| 140 | 1 | 0 | 0.204552  | 3.657890 | -2.605411 |
| 141 | 1 | 0 | 0.601724  | 3.520954 | -0.889739 |
| 142 | 1 | 0 | 0.414478  | 5.122876 | -1.626879 |
| 143 | 6 | 0 | -2.179528 | 5.030846 | 0.387778  |
| 144 | 1 | 0 | -1.906577 | 4.468149 | 1.286393  |
| 145 | 1 | 0 | -3.249781 | 5.259370 | 0.446712  |
| 146 | 1 | 0 | -1.633544 | 5.981525 | 0.406753  |

-----

**Compound 4. B3LYP / H, C, Si 6-31G(d); Pb: SDD C<sub>1</sub>**

-----

| Center<br>Number | Atomic<br>Number | Atomic<br>Type | Coordinates (Angstroms) |           |           |
|------------------|------------------|----------------|-------------------------|-----------|-----------|
|                  |                  |                | X                       | Y         | Z         |
| 1                | 82               | 0              | -1.692135               | -0.365895 | -0.918314 |
| 2                | 82               | 0              | 1.381489                | 0.015078  | 0.102460  |
| 3                | 14               | 0              | -3.065758               | -1.676595 | 1.180219  |
| 4                | 14               | 0              | -4.347631               | 0.001871  | 2.288314  |
| 5                | 14               | 0              | -5.071813               | 1.644350  | 0.729076  |
| 6                | 14               | 0              | -3.284958               | 1.956998  | -0.826129 |
| 7                | 14               | 0              | -1.775499               | -2.842898 | 2.815632  |
| 8                | 14               | 0              | -4.488577               | -3.326343 | 0.193834  |
| 9                | 14               | 0              | -4.120865               | 2.121269  | -3.058412 |
| 10               | 14               | 0              | -2.131847               | 3.972675  | -0.326251 |
| 11               | 14               | 0              | 3.511032                | 1.642328  | 0.957044  |
| 12               | 14               | 0              | 5.537844                | 0.593334  | 0.249301  |
| 13               | 14               | 0              | 5.128342                | -1.707486 | -0.155561 |
| 14               | 14               | 0              | 2.962799                | -1.894742 | -1.134649 |
| 15               | 14               | 0              | 3.294561                | 1.569797  | 3.340862  |
| 16               | 14               | 0              | 3.608201                | 3.948228  | 0.331530  |
| 17               | 14               | 0              | 2.910936                | -1.142464 | -3.419226 |
| 18               | 14               | 0              | 2.182339                | -4.147038 | -1.042112 |
| 19               | 6                | 0              | -5.844349               | -0.709334 | 3.251640  |
| 20               | 1                | 0              | -5.524978               | -1.429732 | 4.013926  |
| 21               | 1                | 0              | -6.551836               | -1.216343 | 2.585605  |
| 22               | 1                | 0              | -6.388977               | 0.095487  | 3.762250  |
| 23               | 6                | 0              | -3.228898               | 0.893006  | 3.562733  |
| 24               | 1                | 0              | -3.783944               | 1.690745  | 4.072115  |
| 25               | 1                | 0              | -2.358774               | 1.351119  | 3.079510  |
| 26               | 1                | 0              | -2.862121               | 0.203092  | 4.331514  |
| 27               | 6                | 0              | -6.700826               | 1.109657  | -0.121977 |
| 28               | 1                | 0              | -7.456618               | 0.845406  | 0.628800  |
| 29               | 1                | 0              | -6.572380               | 0.248841  | -0.783895 |
| 30               | 1                | 0              | -7.107354               | 1.934110  | -0.719972 |
| 31               | 6                | 0              | -5.527414               | 3.238258  | 1.692442  |
| 32               | 1                | 0              | -6.330073               | 3.030931  | 2.412132  |
| 33               | 1                | 0              | -5.890405               | 4.017057  | 1.010557  |
| 34               | 1                | 0              | -4.680045               | 3.649484  | 2.250027  |
| 35               | 6                | 0              | -0.147731               | -1.939269 | 3.233100  |
| 36               | 1                | 0              | 0.357334                | -2.418472 | 4.082054  |
| 37               | 1                | 0              | -0.318836               | -0.888028 | 3.491467  |
| 38               | 1                | 0              | 0.540988                | -1.974395 | 2.378062  |
| 39               | 6                | 0              | -1.306591               | -4.603205 | 2.258040  |
| 40               | 1                | 0              | -0.661574               | -5.075841 | 3.010709  |
| 41               | 1                | 0              | -0.763796               | -4.606037 | 1.307064  |
| 42               | 1                | 0              | -2.191415               | -5.238287 | 2.137836  |
| 43               | 6                | 0              | -2.744042               | -3.026821 | 4.449264  |
| 44               | 1                | 0              | -3.700216               | -3.540688 | 4.297975  |
| 45               | 1                | 0              | -2.957484               | -2.058767 | 4.915365  |
| 46               | 1                | 0              | -2.158099               | -3.617606 | 5.166009  |
| 47               | 6                | 0              | -5.860985               | -2.573407 | -0.887033 |
| 48               | 1                | 0              | -5.456222               | -1.935321 | -1.680643 |
| 49               | 1                | 0              | -6.562058               | -1.973096 | -0.297479 |
| 50               | 1                | 0              | -6.436623               | -3.375319 | -1.368149 |
| 51               | 6                | 0              | -5.350266               | -4.359459 | 1.545286  |
| 52               | 1                | 0              | -6.003728               | -5.112637 | 1.084871  |
| 53               | 1                | 0              | -5.971366               | -3.734564 | 2.196963  |
| 54               | 1                | 0              | -4.631078               | -4.889232 | 2.180063  |
| 55               | 6                | 0              | -3.507974               | -4.524260 | -0.915403 |
| 56               | 1                | 0              | -2.720762               | -5.046664 | -0.362232 |
| 57               | 1                | 0              | -3.032539               | -4.007225 | -1.756961 |
| 58               | 1                | 0              | -4.184108               | -5.282958 | -1.331946 |

|     |   |   |           |           |           |
|-----|---|---|-----------|-----------|-----------|
| 59  | 6 | 0 | -2.745094 | 2.625339  | -4.278621 |
| 60  | 1 | 0 | -2.386005 | 3.643321  | -4.089699 |
| 61  | 1 | 0 | -3.128921 | 2.597360  | -5.307208 |
| 62  | 1 | 0 | -1.881227 | 1.952171  | -4.228883 |
| 63  | 6 | 0 | -4.796988 | 0.443163  | -3.661341 |
| 64  | 1 | 0 | -5.631847 | 0.091631  | -3.045228 |
| 65  | 1 | 0 | -4.022203 | -0.333949 | -3.651357 |
| 66  | 1 | 0 | -5.161064 | 0.528593  | -4.693816 |
| 67  | 6 | 0 | -5.522509 | 3.401195  | -3.235841 |
| 68  | 1 | 0 | -6.389054 | 3.145878  | -2.615926 |
| 69  | 1 | 0 | -5.862940 | 3.447628  | -4.279151 |
| 70  | 1 | 0 | -5.194028 | 4.406412  | -2.948336 |
| 71  | 6 | 0 | -1.591127 | 4.017893  | 1.500034  |
| 72  | 1 | 0 | -0.935211 | 3.176029  | 1.750507  |
| 73  | 1 | 0 | -2.449623 | 3.978784  | 2.179270  |
| 74  | 1 | 0 | -1.043380 | 4.944587  | 1.715561  |
| 75  | 6 | 0 | -3.198629 | 5.521196  | -0.641990 |
| 76  | 1 | 0 | -2.646306 | 6.426790  | -0.356681 |
| 77  | 1 | 0 | -4.126941 | 5.500445  | -0.060438 |
| 78  | 1 | 0 | -3.470092 | 5.620118  | -1.699366 |
| 79  | 6 | 0 | -0.566854 | 4.138455  | -1.399511 |
| 80  | 1 | 0 | -0.019766 | 5.055165  | -1.145278 |
| 81  | 1 | 0 | -0.805668 | 4.178641  | -2.467763 |
| 82  | 1 | 0 | 0.111292  | 3.290936  | -1.245253 |
| 83  | 6 | 0 | 6.182209  | 1.364103  | -1.380343 |
| 84  | 1 | 0 | 6.419686  | 2.427506  | -1.264058 |
| 85  | 1 | 0 | 5.455626  | 1.271730  | -2.194668 |
| 86  | 1 | 0 | 7.101119  | 0.854020  | -1.696078 |
| 87  | 6 | 0 | 6.939992  | 0.797913  | 1.538904  |
| 88  | 1 | 0 | 7.860641  | 0.319510  | 1.180468  |
| 89  | 1 | 0 | 6.684141  | 0.344465  | 2.502937  |
| 90  | 1 | 0 | 7.164363  | 1.856667  | 1.715635  |
| 91  | 6 | 0 | 5.205448  | -2.665848 | 1.498994  |
| 92  | 1 | 0 | 5.205002  | -3.747596 | 1.323409  |
| 93  | 1 | 0 | 4.368948  | -2.434819 | 2.165677  |
| 94  | 1 | 0 | 6.133906  | -2.422172 | 2.030761  |
| 95  | 6 | 0 | 6.528297  | -2.442862 | -1.235143 |
| 96  | 1 | 0 | 7.486637  | -2.373827 | -0.704209 |
| 97  | 1 | 0 | 6.638094  | -1.927052 | -2.193657 |
| 98  | 1 | 0 | 6.344904  | -3.503417 | -1.446426 |
| 99  | 6 | 0 | 1.545605  | 2.104452  | 3.866923  |
| 100 | 1 | 0 | 1.281010  | 3.096709  | 3.486195  |
| 101 | 1 | 0 | 1.475917  | 2.137416  | 4.962219  |
| 102 | 1 | 0 | 0.784627  | 1.400007  | 3.510722  |
| 103 | 6 | 0 | 3.586533  | -0.174630 | 4.045270  |
| 104 | 1 | 0 | 3.502716  | -0.148284 | 5.139944  |
| 105 | 1 | 0 | 4.581125  | -0.562928 | 3.800660  |
| 106 | 1 | 0 | 2.845466  | -0.896020 | 3.680443  |
| 107 | 6 | 0 | 4.543761  | 2.740775  | 4.175080  |
| 108 | 1 | 0 | 4.368981  | 3.787391  | 3.901616  |
| 109 | 1 | 0 | 5.577628  | 2.493345  | 3.910036  |
| 110 | 1 | 0 | 4.451600  | 2.665149  | 5.266833  |
| 111 | 6 | 0 | 2.308777  | 4.994345  | 1.242988  |
| 112 | 1 | 0 | 2.486302  | 5.006242  | 2.324689  |
| 113 | 1 | 0 | 1.291435  | 4.629181  | 1.074680  |
| 114 | 1 | 0 | 2.353965  | 6.033504  | 0.890576  |
| 115 | 6 | 0 | 5.316965  | 4.654441  | 0.798964  |
| 116 | 1 | 0 | 6.134921  | 4.147262  | 0.275614  |
| 117 | 1 | 0 | 5.514039  | 4.582621  | 1.874047  |
| 118 | 1 | 0 | 5.359756  | 5.717341  | 0.525016  |
| 119 | 6 | 0 | 3.388841  | 4.190601  | -1.541496 |
| 120 | 1 | 0 | 3.453467  | 5.258598  | -1.788913 |
| 121 | 1 | 0 | 2.417817  | 3.828166  | -1.894093 |
| 122 | 1 | 0 | 4.169669  | 3.672865  | -2.109665 |
| 123 | 6 | 0 | 2.497118  | 0.714194  | -3.533514 |
| 124 | 1 | 0 | 2.538703  | 1.044017  | -4.580157 |
| 125 | 1 | 0 | 3.190217  | 1.342508  | -2.964008 |
| 126 | 1 | 0 | 1.480618  | 0.921647  | -3.174080 |
| 127 | 6 | 0 | 4.569917  | -1.427479 | -4.307188 |
| 128 | 1 | 0 | 4.878117  | -2.478380 | -4.268962 |
| 129 | 1 | 0 | 5.376012  | -0.826399 | -3.872734 |
| 130 | 1 | 0 | 4.477328  | -1.143788 | -5.364125 |
| 131 | 6 | 0 | 1.567845  | -2.054862 | -4.409226 |

|     |   |   |           |           |           |
|-----|---|---|-----------|-----------|-----------|
| 132 | 1 | 0 | 0.574448  | -1.924970 | -3.965301 |
| 133 | 1 | 0 | 1.766164  | -3.129670 | -4.487473 |
| 134 | 1 | 0 | 1.531136  | -1.650605 | -5.429663 |
| 135 | 6 | 0 | 3.271683  | -5.248367 | -2.153243 |
| 136 | 1 | 0 | 2.931532  | -6.291229 | -2.100591 |
| 137 | 1 | 0 | 4.322731  | -5.227268 | -1.841935 |
| 138 | 1 | 0 | 3.230287  | -4.941024 | -3.204697 |
| 139 | 6 | 0 | 0.384446  | -4.300947 | -1.636569 |
| 140 | 1 | 0 | 0.278979  | -4.022767 | -2.689904 |
| 141 | 1 | 0 | -0.293014 | -3.662236 | -1.059013 |
| 142 | 1 | 0 | 0.039136  | -5.337747 | -1.528786 |
| 143 | 6 | 0 | 2.280094  | -4.846560 | 0.724713  |
| 144 | 1 | 0 | 1.769883  | -4.207919 | 1.453703  |
| 145 | 1 | 0 | 3.315786  | -4.967884 | 1.057721  |
| 146 | 1 | 0 | 1.802402  | -5.834471 | 0.760892  |

-----

**Compound [4(C<sub>6</sub>H<sub>6</sub>)<sub>2</sub>]. M06-2X / H, C, Si: 6-31G(d); Pb: SDD C<sub>1</sub>**

-----

| Center<br>Number | Atomic<br>Number | Atomic<br>Type | Coordinates (Angstroms) |           |           |
|------------------|------------------|----------------|-------------------------|-----------|-----------|
|                  |                  |                | X                       | Y         | Z         |
| 1                | 82               | 0              | -1.695097               | 0.175051  | -0.502139 |
| 2                | 82               | 0              | 1.220190                | -0.562085 | 0.150904  |
| 3                | 14               | 0              | -2.571091               | -2.483276 | -0.433185 |
| 4                | 14               | 0              | -3.305062               | -2.908116 | 1.760544  |
| 5                | 14               | 0              | -4.209153               | -0.968135 | 2.724985  |
| 6                | 14               | 0              | -2.909240               | 0.802816  | 1.906903  |
| 7                | 14               | 0              | -1.189529               | -4.294203 | -1.015573 |
| 8                | 14               | 0              | -4.386922               | -2.554510 | -1.912780 |
| 9                | 14               | 0              | -4.241648               | 2.688451  | 1.491072  |
| 10               | 14               | 0              | -1.322512               | 1.487233  | 3.479535  |
| 11               | 14               | 0              | 3.511401                | -0.426225 | 1.691207  |
| 12               | 14               | 0              | 5.346485                | -0.466339 | 0.203453  |
| 13               | 14               | 0              | 4.686699                | -1.437709 | -1.822919 |
| 14               | 14               | 0              | 2.537465                | -0.607887 | -2.239831 |
| 15               | 14               | 0              | 3.580267                | -2.411469 | 2.968942  |
| 16               | 14               | 0              | 3.907476                | 1.396476  | 3.140854  |
| 17               | 14               | 0              | 2.503578                | 1.735269  | -2.540367 |
| 18               | 14               | 0              | 1.536544                | -1.589004 | -4.116976 |
| 19               | 6                | 0              | -4.546487               | -4.346438 | 1.904826  |
| 20               | 1                | 0              | -4.154907               | -5.277700 | 1.483733  |
| 21               | 1                | 0              | -5.477768               | -4.103178 | 1.380977  |
| 22               | 1                | 0              | -4.794436               | -4.527676 | 2.957346  |
| 23               | 6                | 0              | -1.741211               | -3.308076 | 2.774953  |
| 24               | 1                | 0              | -1.965023               | -3.441273 | 3.839952  |
| 25               | 1                | 0              | -1.035327               | -2.472879 | 2.683641  |
| 26               | 1                | 0              | -1.237058               | -4.214040 | 2.419499  |
| 27               | 6                | 0              | -6.051128               | -0.731590 | 2.297515  |
| 28               | 1                | 0              | -6.588754               | -1.686960 | 2.304919  |
| 29               | 1                | 0              | -6.194615               | -0.269668 | 1.316794  |
| 30               | 1                | 0              | -6.516971               | -0.083702 | 3.048138  |
| 31               | 6                | 0              | -4.152484               | -1.135698 | 4.624390  |
| 32               | 1                | 0              | -4.744137               | -2.000161 | 4.948363  |
| 33               | 1                | 0              | -4.582550               | -0.241972 | 5.090972  |
| 34               | 1                | 0              | -3.136112               | -1.260456 | 5.009520  |
| 35               | 6                | 0              | 0.600232                | -4.029254 | -0.425983 |
| 36               | 1                | 0              | 1.187582                | -4.953774 | -0.493737 |
| 37               | 1                | 0              | 0.616349                | -3.698582 | 0.622559  |
| 38               | 1                | 0              | 1.100845                | -3.276969 | -1.050933 |
| 39               | 6                | 0              | -1.156860               | -4.647681 | -2.876975 |
| 40               | 1                | 0              | -0.456398               | -5.464002 | -3.092636 |
| 41               | 1                | 0              | -0.851943               | -3.780297 | -3.468400 |
| 42               | 1                | 0              | -2.147183               | -4.960482 | -3.226041 |
| 43               | 6                | 0              | -1.831703               | -5.883300 | -0.204150 |
| 44               | 1                | 0              | -2.858813               | -6.090007 | -0.525365 |
| 45               | 1                | 0              | -1.828242               | -5.828157 | 0.888979  |
| 46               | 1                | 0              | -1.208907               | -6.735683 | -0.500974 |
| 47               | 6                | 0              | -5.748413               | -1.395550 | -1.297018 |
| 48               | 1                | 0              | -5.350849               | -0.392508 | -1.097996 |
| 49               | 1                | 0              | -6.186104               | -1.772622 | -0.366602 |
| 50               | 1                | 0              | -6.553124               | -1.299744 | -2.035030 |

|     |   |   |           |           |           |
|-----|---|---|-----------|-----------|-----------|
| 51  | 6 | 0 | -5.108175 | -4.302970 | -2.038136 |
| 52  | 1 | 0 | -6.002027 | -4.307791 | -2.672983 |
| 53  | 1 | 0 | -5.392582 | -4.680042 | -1.049963 |
| 54  | 1 | 0 | -4.389324 | -5.008265 | -2.468873 |
| 55  | 6 | 0 | -3.866620 | -1.988002 | -3.643542 |
| 56  | 1 | 0 | -3.101183 | -2.647311 | -4.066480 |
| 57  | 1 | 0 | -3.451869 | -0.973079 | -3.617661 |
| 58  | 1 | 0 | -4.727475 | -1.986337 | -4.322480 |
| 59  | 6 | 0 | -3.105818 | 4.198283  | 1.328326  |
| 60  | 1 | 0 | -2.612278 | 4.442641  | 2.275891  |
| 61  | 1 | 0 | -3.668322 | 5.078667  | 0.994817  |
| 62  | 1 | 0 | -2.331601 | 3.989141  | 0.581887  |
| 63  | 6 | 0 | -5.213525 | 2.524059  | -0.124416 |
| 64  | 1 | 0 | -5.952080 | 1.716446  | -0.066797 |
| 65  | 1 | 0 | -4.550520 | 2.323072  | -0.975478 |
| 66  | 1 | 0 | -5.750950 | 3.454283  | -0.344683 |
| 67  | 6 | 0 | -5.477167 | 3.025870  | 2.887608  |
| 68  | 1 | 0 | -6.249759 | 2.251097  | 2.921820  |
| 69  | 1 | 0 | -5.976513 | 3.989334  | 2.730003  |
| 70  | 1 | 0 | -4.985868 | 3.054822  | 3.865498  |
| 71  | 6 | 0 | -0.385894 | -0.003423 | 4.186821  |
| 72  | 1 | 0 | 0.389415  | -0.329278 | 3.480589  |
| 73  | 1 | 0 | -1.045705 | -0.857349 | 4.369139  |
| 74  | 1 | 0 | 0.110531  | 0.244110  | 5.132041  |
| 75  | 6 | 0 | -2.113564 | 2.434319  | 4.918199  |
| 76  | 1 | 0 | -1.351821 | 2.725424  | 5.651774  |
| 77  | 1 | 0 | -2.857902 | 1.815559  | 5.430987  |
| 78  | 1 | 0 | -2.614109 | 3.346194  | 4.574166  |
| 79  | 6 | 0 | -0.041907 | 2.627760  | 2.653242  |
| 80  | 1 | 0 | 0.532841  | 3.194454  | 3.396613  |
| 81  | 1 | 0 | -0.512102 | 3.342672  | 1.969551  |
| 82  | 1 | 0 | 0.671778  | 2.033169  | 2.067446  |
| 83  | 6 | 0 | 5.945518  | 1.294341  | -0.216676 |
| 84  | 1 | 0 | 6.344971  | 1.813253  | 0.661206  |
| 85  | 1 | 0 | 5.143731  | 1.911064  | -0.634998 |
| 86  | 1 | 0 | 6.748551  | 1.239041  | -0.961947 |
| 87  | 6 | 0 | 6.828487  | -1.376776 | 0.978692  |
| 88  | 1 | 0 | 7.674483  | -1.390691 | 0.281670  |
| 89  | 1 | 0 | 6.583371  | -2.412965 | 1.232380  |
| 90  | 1 | 0 | 7.155937  | -0.873317 | 1.895157  |
| 91  | 6 | 0 | 4.638806  | -3.335605 | -1.704712 |
| 92  | 1 | 0 | 4.541803  | -3.776295 | -2.702147 |
| 93  | 1 | 0 | 3.796559  | -3.687416 | -1.100523 |
| 94  | 1 | 0 | 5.562008  | -3.721285 | -1.256726 |
| 95  | 6 | 0 | 5.937147  | -0.986501 | -3.184464 |
| 96  | 1 | 0 | 6.940263  | -1.339627 | -2.918269 |
| 97  | 1 | 0 | 5.988375  | 0.094500  | -3.345960 |
| 98  | 1 | 0 | 5.658217  | -1.456363 | -4.134360 |
| 99  | 6 | 0 | 1.975915  | -2.714022 | 3.919207  |
| 100 | 1 | 0 | 1.760119  | -1.913588 | 4.634044  |
| 101 | 1 | 0 | 2.054620  | -3.654734 | 4.477715  |
| 102 | 1 | 0 | 1.113385  | -2.799597 | 3.248622  |
| 103 | 6 | 0 | 3.843543  | -3.897835 | 1.829906  |
| 104 | 1 | 0 | 3.900862  | -4.819192 | 2.421689  |
| 105 | 1 | 0 | 4.763272  | -3.816808 | 1.241790  |
| 106 | 1 | 0 | 3.008333  | -4.004717 | 1.128290  |
| 107 | 6 | 0 | 4.987343  | -2.353258 | 4.234210  |
| 108 | 1 | 0 | 4.811606  | -1.576142 | 4.986092  |
| 109 | 1 | 0 | 5.958378  | -2.162175 | 3.766433  |
| 110 | 1 | 0 | 5.048350  | -3.314730 | 4.758211  |
| 111 | 6 | 0 | 2.843418  | 1.325368  | 4.699529  |
| 112 | 1 | 0 | 2.863969  | 0.331871  | 5.161620  |
| 113 | 1 | 0 | 1.802141  | 1.570707  | 4.475825  |
| 114 | 1 | 0 | 3.214803  | 2.049299  | 5.434640  |
| 115 | 6 | 0 | 5.720195  | 1.254202  | 3.683678  |
| 116 | 1 | 0 | 6.410255  | 1.348324  | 2.838939  |
| 117 | 1 | 0 | 5.924167  | 0.299677  | 4.178426  |
| 118 | 1 | 0 | 5.951666  | 2.057966  | 4.393513  |
| 119 | 6 | 0 | 3.700928  | 3.104661  | 2.350604  |
| 120 | 1 | 0 | 3.924926  | 3.866830  | 3.108377  |
| 121 | 1 | 0 | 2.686140  | 3.282473  | 1.981499  |
| 122 | 1 | 0 | 4.390586  | 3.252107  | 1.512436  |
| 123 | 6 | 0 | 2.360774  | 2.572432  | -0.845902 |

|     |   |   |           |           |           |
|-----|---|---|-----------|-----------|-----------|
| 124 | 1 | 0 | 2.638026  | 3.631302  | -0.907251 |
| 125 | 1 | 0 | 2.998069  | 2.111431  | -0.083443 |
| 126 | 1 | 0 | 1.320010  | 2.546348  | -0.488314 |
| 127 | 6 | 0 | 4.013153  | 2.408631  | -3.459599 |
| 128 | 1 | 0 | 4.116964  | 1.943040  | -4.445638 |
| 129 | 1 | 0 | 4.943067  | 2.240083  | -2.907111 |
| 130 | 1 | 0 | 3.899125  | 3.490397  | -3.602775 |
| 131 | 6 | 0 | 0.944848  | 2.226774  | -3.493513 |
| 132 | 1 | 0 | 0.063317  | 1.795109  | -3.003731 |
| 133 | 1 | 0 | 0.950813  | 1.896658  | -4.537458 |
| 134 | 1 | 0 | 0.834579  | 3.318498  | -3.480017 |
| 135 | 6 | 0 | 2.310903  | -0.823255 | -5.667469 |
| 136 | 1 | 0 | 1.891750  | -1.275068 | -6.574252 |
| 137 | 1 | 0 | 3.394599  | -0.983790 | -5.680615 |
| 138 | 1 | 0 | 2.132887  | 0.255946  | -5.717313 |
| 139 | 6 | 0 | -0.323813 | -1.247523 | -4.140625 |
| 140 | 1 | 0 | -0.508617 | -0.173905 | -4.259066 |
| 141 | 1 | 0 | -0.810626 | -1.564688 | -3.210473 |
| 142 | 1 | 0 | -0.812822 | -1.767785 | -4.973409 |
| 143 | 6 | 0 | 1.892679  | -3.447267 | -4.186297 |
| 144 | 1 | 0 | 1.678985  | -3.960956 | -3.243669 |
| 145 | 1 | 0 | 2.949481  | -3.609895 | -4.425787 |
| 146 | 1 | 0 | 1.294897  | -3.925145 | -4.971720 |
| 147 | 6 | 0 | -2.277267 | 3.622533  | -2.389490 |
| 148 | 6 | 0 | -3.002611 | 4.776931  | -2.099883 |
| 149 | 6 | 0 | -2.810971 | 2.663836  | -3.251398 |
| 150 | 6 | 0 | -4.265487 | 4.966447  | -2.658470 |
| 151 | 1 | 0 | -2.586027 | 5.529414  | -1.435140 |
| 152 | 6 | 0 | -4.074688 | 2.852284  | -3.807496 |
| 153 | 1 | 0 | -2.239705 | 1.770431  | -3.490632 |
| 154 | 6 | 0 | -4.802989 | 4.002312  | -3.507911 |
| 155 | 1 | 0 | -4.831114 | 5.864003  | -2.427430 |
| 156 | 1 | 0 | -4.490504 | 2.103033  | -4.474398 |
| 157 | 1 | 0 | -5.789204 | 4.146777  | -3.938305 |
| 158 | 1 | 0 | -1.294674 | 3.469229  | -1.946256 |
| 159 | 6 | 0 | 0.663693  | 5.713116  | -1.647937 |
| 160 | 6 | 0 | 1.948197  | 6.121467  | -2.006055 |
| 161 | 6 | 0 | 0.359023  | 5.473338  | -0.309117 |
| 162 | 6 | 0 | 2.924263  | 6.293785  | -1.025257 |
| 163 | 1 | 0 | 2.185723  | 6.311244  | -3.048785 |
| 164 | 6 | 0 | 1.335887  | 5.640253  | 0.671190  |
| 165 | 1 | 0 | -0.641965 | 5.160397  | -0.023256 |
| 166 | 6 | 0 | 2.618260  | 6.052070  | 0.313349  |
| 167 | 1 | 0 | 3.923485  | 6.613715  | -1.304935 |
| 168 | 1 | 0 | 1.097667  | 5.444861  | 1.712938  |
| 169 | 1 | 0 | 3.379672  | 6.177450  | 1.077362  |
| 170 | 1 | 0 | -0.100658 | 5.588472  | -2.410658 |

-----

**Compound 5. M06-2X / H, C, Si: 6-31G(d); Pb: SDD C<sub>1</sub>**

| Center<br>Number | Atomic<br>Number | Atomic<br>Type | Coordinates (Angstroms) |           |           |
|------------------|------------------|----------------|-------------------------|-----------|-----------|
|                  |                  |                | X                       | Y         | Z         |
| 1                | 82               | 0              | 0.078814                | 0.151377  | -1.776181 |
| 2                | 14               | 0              | -1.895267               | -0.031210 | 0.123746  |
| 3                | 14               | 0              | -1.049025               | -0.041030 | 2.309019  |
| 4                | 14               | 0              | 1.139328                | -0.884897 | 2.194853  |
| 5                | 14               | 0              | 2.011602                | -0.054326 | 0.175752  |
| 6                | 14               | 0              | -2.973282               | -2.074301 | -0.333936 |
| 7                | 14               | 0              | -3.565439               | 1.605129  | -0.090974 |
| 8                | 14               | 0              | 2.499355                | 2.248391  | 0.351079  |
| 9                | 14               | 0              | 3.869668                | -1.310883 | -0.505053 |
| 10               | 6                | 0              | -0.920801               | 1.746989  | 2.956958  |
| 11               | 1                | 0              | -1.906945               | 2.217355  | 3.042042  |
| 12               | 1                | 0              | -0.311301               | 2.367003  | 2.289945  |
| 13               | 1                | 0              | -0.455413               | 1.766587  | 3.949797  |
| 14               | 6                | 0              | -2.153244               | -1.016216 | 3.515319  |
| 15               | 1                | 0              | -1.721503               | -1.022527 | 4.522737  |
| 16               | 1                | 0              | -2.274748               | -2.056844 | 3.195301  |
| 17               | 1                | 0              | -3.150096               | -0.564681 | 3.578039  |
| 18               | 6                | 0              | 1.169332                | -2.785799 | 2.145316  |

|    |   |   |           |           |           |
|----|---|---|-----------|-----------|-----------|
| 19 | 1 | 0 | 2.202832  | -3.147465 | 2.203917  |
| 20 | 1 | 0 | 0.726566  | -3.176059 | 1.224808  |
| 21 | 1 | 0 | 0.618891  | -3.208810 | 2.993714  |
| 22 | 6 | 0 | 2.129801  | -0.377834 | 3.740608  |
| 23 | 1 | 0 | 1.724602  | -0.884394 | 4.624552  |
| 24 | 1 | 0 | 2.088567  | 0.699841  | 3.920038  |
| 25 | 1 | 0 | 3.183186  | -0.663032 | 3.642273  |
| 26 | 6 | 0 | -3.279096 | -2.260794 | -2.195412 |
| 27 | 1 | 0 | -3.817657 | -1.404437 | -2.613150 |
| 28 | 1 | 0 | -3.869019 | -3.162713 | -2.397050 |
| 29 | 1 | 0 | -2.333444 | -2.356040 | -2.742090 |
| 30 | 6 | 0 | -1.909684 | -3.547992 | 0.198043  |
| 31 | 1 | 0 | -2.435054 | -4.489844 | 0.000523  |
| 32 | 1 | 0 | -1.664630 | -3.516267 | 1.264894  |
| 33 | 1 | 0 | -0.966046 | -3.569478 | -0.359901 |
| 34 | 6 | 0 | -4.637168 | -2.180295 | 0.562433  |
| 35 | 1 | 0 | -5.337443 | -1.426796 | 0.186015  |
| 36 | 1 | 0 | -4.519999 | -2.021899 | 1.639881  |
| 37 | 1 | 0 | -5.091667 | -3.166462 | 0.410600  |
| 38 | 6 | 0 | -4.593310 | 1.294449  | -1.649967 |
| 39 | 1 | 0 | -5.128202 | 0.340501  | -1.587852 |
| 40 | 1 | 0 | -3.961941 | 1.267048  | -2.544821 |
| 41 | 1 | 0 | -5.337827 | 2.087281  | -1.785988 |
| 42 | 6 | 0 | -4.721767 | 1.569584  | 1.410236  |
| 43 | 1 | 0 | -4.175795 | 1.790703  | 2.333819  |
| 44 | 1 | 0 | -5.197081 | 0.590940  | 1.531467  |
| 45 | 1 | 0 | -5.513799 | 2.320305  | 1.302795  |
| 46 | 6 | 0 | -2.824019 | 3.343467  | -0.207970 |
| 47 | 1 | 0 | -3.618283 | 4.090874  | -0.319560 |
| 48 | 1 | 0 | -2.151625 | 3.436483  | -1.068155 |
| 49 | 1 | 0 | -2.252387 | 3.594476  | 0.692202  |
| 50 | 6 | 0 | 1.014999  | 3.229827  | -0.322494 |
| 51 | 1 | 0 | 1.128206  | 4.305464  | -0.142517 |
| 52 | 1 | 0 | 0.072181  | 2.915638  | 0.140694  |
| 53 | 1 | 0 | 0.922081  | 3.101538  | -1.411278 |
| 54 | 6 | 0 | 2.835558  | 2.824337  | 2.119943  |
| 55 | 1 | 0 | 3.651412  | 2.252522  | 2.574654  |
| 56 | 1 | 0 | 1.951643  | 2.713260  | 2.756266  |
| 57 | 1 | 0 | 3.119496  | 3.883637  | 2.120494  |
| 58 | 6 | 0 | 3.995992  | 2.716390  | -0.708010 |
| 59 | 1 | 0 | 3.867360  | 2.399364  | -1.748254 |
| 60 | 1 | 0 | 4.913119  | 2.255230  | -0.326192 |
| 61 | 1 | 0 | 4.137588  | 3.803666  | -0.698816 |
| 62 | 6 | 0 | 5.107529  | -1.480257 | 0.917620  |
| 63 | 1 | 0 | 5.983982  | -2.064577 | 0.614496  |
| 64 | 1 | 0 | 4.645698  | -1.985501 | 1.773405  |
| 65 | 1 | 0 | 5.454760  | -0.498499 | 1.258028  |
| 66 | 6 | 0 | 4.745986  | -0.561470 | -2.006513 |
| 67 | 1 | 0 | 5.281593  | 0.357618  | -1.753370 |
| 68 | 1 | 0 | 4.035109  | -0.328334 | -2.807023 |
| 69 | 1 | 0 | 5.474722  | -1.276935 | -2.405376 |
| 70 | 6 | 0 | 3.290431  | -3.042659 | -1.010454 |
| 71 | 1 | 0 | 2.612832  | -2.991294 | -1.870284 |
| 72 | 1 | 0 | 2.764662  | -3.551600 | -0.196783 |
| 73 | 1 | 0 | 4.147708  | -3.662303 | -1.298835 |

-----

**Compound 5. B3LYP / H, C, Si: 6-31G(d); Pb: SDD C<sub>1</sub>**

| Center<br>Number | Atomic<br>Number | Atomic<br>Type | Coordinates (Angstroms) |           |           |
|------------------|------------------|----------------|-------------------------|-----------|-----------|
|                  |                  |                | X                       | Y         | Z         |
| 1                | 82               | 0              | 0.045486                | -0.038750 | -1.713533 |
| 2                | 14               | 0              | -1.993098               | -0.013273 | 0.161477  |
| 3                | 14               | 0              | -1.084773               | 0.287094  | 2.342093  |
| 4                | 14               | 0              | 1.132421                | -0.578575 | 2.326191  |
| 5                | 14               | 0              | 2.056495                | -0.030070 | 0.196218  |
| 6                | 14               | 0              | -3.123469               | -2.103499 | -0.086486 |
| 7                | 14               | 0              | -3.561542               | 1.705829  | -0.364392 |
| 8                | 14               | 0              | 2.829873                | 2.238207  | 0.079527  |
| 9                | 14               | 0              | 3.767204                | -1.555233 | -0.451212 |
| 10               | 6                | 0              | -0.978183               | 2.153053  | 2.759494  |

|    |   |   |           |           |           |
|----|---|---|-----------|-----------|-----------|
| 11 | 1 | 0 | -1.970793 | 2.617966  | 2.781497  |
| 12 | 1 | 0 | -0.369880 | 2.699457  | 2.029706  |
| 13 | 1 | 0 | -0.522202 | 2.298056  | 3.747002  |
| 14 | 6 | 0 | -2.145742 | -0.523785 | 3.715694  |
| 15 | 1 | 0 | -1.704042 | -0.351166 | 4.705517  |
| 16 | 1 | 0 | -2.236983 | -1.606915 | 3.576466  |
| 17 | 1 | 0 | -3.158512 | -0.102355 | 3.726488  |
| 18 | 6 | 0 | 1.085356  | -2.477373 | 2.566947  |
| 19 | 1 | 0 | 2.098926  | -2.885448 | 2.663074  |
| 20 | 1 | 0 | 0.589900  | -2.997943 | 1.741997  |
| 21 | 1 | 0 | 0.544008  | -2.723982 | 3.489282  |
| 22 | 6 | 0 | 2.128904  | 0.083605  | 3.822768  |
| 23 | 1 | 0 | 1.677144  | -0.266833 | 4.759931  |
| 24 | 1 | 0 | 2.167198  | 1.176250  | 3.857107  |
| 25 | 1 | 0 | 3.161800  | -0.285160 | 3.797233  |
| 26 | 6 | 0 | -3.455501 | -2.466823 | -1.927602 |
| 27 | 1 | 0 | -4.050891 | -1.680367 | -2.403739 |
| 28 | 1 | 0 | -4.005141 | -3.411627 | -2.033151 |
| 29 | 1 | 0 | -2.523541 | -2.562814 | -2.498188 |
| 30 | 6 | 0 | -2.099229 | -3.558051 | 0.593074  |
| 31 | 1 | 0 | -2.654304 | -4.497293 | 0.468291  |
| 32 | 1 | 0 | -1.878477 | -3.443587 | 1.660019  |
| 33 | 1 | 0 | -1.143602 | -3.668971 | 0.066900  |
| 34 | 6 | 0 | -4.797733 | -2.115843 | 0.823640  |
| 35 | 1 | 0 | -5.484560 | -1.358519 | 0.428414  |
| 36 | 1 | 0 | -4.677721 | -1.928769 | 1.896962  |
| 37 | 1 | 0 | -5.282593 | -3.094652 | 0.708359  |
| 38 | 6 | 0 | -4.534116 | 1.301403  | -1.951602 |
| 39 | 1 | 0 | -5.180436 | 0.425646  | -1.821696 |
| 40 | 1 | 0 | -3.869101 | 1.102370  | -2.800069 |
| 41 | 1 | 0 | -5.177785 | 2.148135  | -2.224663 |
| 42 | 6 | 0 | -4.823481 | 1.954897  | 1.041932  |
| 43 | 1 | 0 | -4.337626 | 2.261836  | 1.975481  |
| 44 | 1 | 0 | -5.388014 | 1.038561  | 1.248206  |
| 45 | 1 | 0 | -5.545051 | 2.737695  | 0.772007  |
| 46 | 6 | 0 | -2.676508 | 3.369658  | -0.645990 |
| 47 | 1 | 0 | -3.408535 | 4.159952  | -0.859050 |
| 48 | 1 | 0 | -1.985100 | 3.324399  | -1.496093 |
| 49 | 1 | 0 | -2.102644 | 3.679297  | 0.234727  |
| 50 | 6 | 0 | 1.513161  | 3.339427  | -0.757149 |
| 51 | 1 | 0 | 1.839671  | 4.387780  | -0.771307 |
| 52 | 1 | 0 | 0.549246  | 3.305813  | -0.235706 |
| 53 | 1 | 0 | 1.345197  | 3.044498  | -1.802081 |
| 54 | 6 | 0 | 3.193440  | 2.999593  | 1.785370  |
| 55 | 1 | 0 | 3.938469  | 2.420971  | 2.342518  |
| 56 | 1 | 0 | 2.290773  | 3.063926  | 2.402768  |
| 57 | 1 | 0 | 3.583930  | 4.018583  | 1.660904  |
| 58 | 6 | 0 | 4.413754  | 2.401332  | -0.963438 |
| 59 | 1 | 0 | 4.268582  | 2.042416  | -1.988219 |
| 60 | 1 | 0 | 5.252599  | 1.845415  | -0.529122 |
| 61 | 1 | 0 | 4.710058  | 3.457305  | -1.019810 |
| 62 | 6 | 0 | 5.185395  | -1.594890 | 0.820501  |
| 63 | 1 | 0 | 5.963579  | -2.305902 | 0.512677  |
| 64 | 1 | 0 | 4.829171  | -1.901134 | 1.811340  |
| 65 | 1 | 0 | 5.657463  | -0.611240 | 0.928747  |
| 66 | 6 | 0 | 4.501275  | -1.127656 | -2.155635 |
| 67 | 1 | 0 | 5.070434  | -0.192893 | -2.140090 |
| 68 | 1 | 0 | 3.721275  | -1.031656 | -2.920283 |
| 69 | 1 | 0 | 5.182546  | -1.926937 | -2.476581 |
| 70 | 6 | 0 | 3.057232  | -3.318534 | -0.596064 |
| 71 | 1 | 0 | 2.273454  | -3.375551 | -1.361758 |
| 72 | 1 | 0 | 2.629523  | -3.675102 | 0.346668  |
| 73 | 1 | 0 | 3.851021  | -4.018803 | -0.888462 |

**Compound [6(C<sub>6</sub>H<sub>6</sub>)]. M06-2X / H, C, Si: 6-31G(d); Pb: SDD C<sub>1</sub>**

| Center<br>Number | Atomic<br>Number | Atomic<br>Type | Coordinates (Angstroms) |           |           |
|------------------|------------------|----------------|-------------------------|-----------|-----------|
|                  |                  |                | X                       | Y         | Z         |
| 1                | 14               | 0              | 2.022458                | -0.355247 | 0.077809  |
| 2                | 14               | 0              | 1.324480                | -2.563761 | 0.476396  |
| 3                | 14               | 0              | -0.833755               | -2.477848 | 1.384668  |
| 4                | 14               | 0              | -1.901769               | -0.790137 | 0.142767  |
| 5                | 14               | 0              | 3.167791                | 0.356493  | 1.999347  |
| 6                | 14               | 0              | 3.616189                | -0.427079 | -1.640120 |
| 7                | 14               | 0              | -2.738728               | -1.601559 | -1.909040 |
| 8                | 14               | 0              | -3.660327               | 0.095841  | 1.407233  |
| 9                | 6                | 0              | 1.113035                | -3.476005 | -1.185089 |
| 10               | 1                | 0              | 2.048598                | -3.521359 | -1.753321 |
| 11               | 1                | 0              | 0.363733                | -2.979086 | -1.812914 |
| 12               | 1                | 0              | 0.773921                | -4.504850 | -1.015223 |
| 13               | 6                | 0              | 2.549547                | -3.576317 | 1.524372  |
| 14               | 1                | 0              | 2.177388                | -4.597035 | 1.669045  |
| 15               | 1                | 0              | 2.702731                | -3.130739 | 2.512988  |
| 16               | 1                | 0              | 3.524669                | -3.639390 | 1.028230  |
| 17               | 6                | 0              | -0.851845               | -2.031404 | 3.233008  |
| 18               | 1                | 0              | -1.862160               | -2.163072 | 3.637657  |
| 19               | 1                | 0              | -0.546190               | -0.997704 | 3.414367  |
| 20               | 1                | 0              | -0.179858               | -2.690029 | 3.795568  |
| 21               | 6                | 0              | -1.652008               | -4.194097 | 1.270859  |
| 22               | 1                | 0              | -1.164564               | -4.879648 | 1.974227  |
| 23               | 1                | 0              | -1.575129               | -4.626453 | 0.269817  |
| 24               | 1                | 0              | -2.714401               | -4.141643 | 1.534169  |
| 25               | 6                | 0              | 3.557526                | 2.212766  | 2.015188  |
| 26               | 1                | 0              | 3.918664                | 2.567725  | 1.044117  |
| 27               | 1                | 0              | 4.334887                | 2.421580  | 2.759602  |
| 28               | 1                | 0              | 2.675850                | 2.800172  | 2.292319  |
| 29               | 6                | 0              | 2.181983                | -0.009335 | 3.572859  |
| 30               | 1                | 0              | 2.760811                | 0.270057  | 4.461040  |
| 31               | 1                | 0              | 1.925224                | -1.070541 | 3.656457  |
| 32               | 1                | 0              | 1.244609                | 0.558670  | 3.591915  |
| 33               | 6                | 0              | 4.829255                | -0.547752 | 2.109362  |
| 34               | 1                | 0              | 5.494719                | -0.239707 | 1.295057  |
| 35               | 1                | 0              | 4.707238                | -1.634000 | 2.050830  |
| 36               | 1                | 0              | 5.328854                | -0.310606 | 3.056387  |
| 37               | 6                | 0              | 4.614545                | 1.183687  | -1.675674 |
| 38               | 1                | 0              | 5.213875                | 1.298011  | -0.765277 |
| 39               | 1                | 0              | 3.951353                | 2.053067  | -1.751302 |
| 40               | 1                | 0              | 5.298466                | 1.205159  | -2.531907 |
| 41               | 6                | 0              | 4.823143                | -1.876094 | -1.454522 |
| 42               | 1                | 0              | 4.296339                | -2.836390 | -1.470868 |
| 43               | 1                | 0              | 5.377294                | -1.818176 | -0.512334 |
| 44               | 1                | 0              | 5.549847                | -1.879867 | -2.275631 |
| 45               | 6                | 0              | 2.738386                | -0.613980 | -3.310857 |
| 46               | 1                | 0              | 3.462197                | -0.662669 | -4.132726 |
| 47               | 1                | 0              | 2.070578                | 0.233585  | -3.507094 |
| 48               | 1                | 0              | 2.136977                | -1.529658 | -3.340872 |
| 49               | 6                | 0              | -1.569024               | -1.129197 | -3.334930 |
| 50               | 1                | 0              | -1.861806               | -1.647379 | -4.255906 |
| 51               | 1                | 0              | -0.521436               | -1.389854 | -3.137941 |
| 52               | 1                | 0              | -1.618006               | -0.053027 | -3.542005 |
| 53               | 6                | 0              | -2.961310               | -3.479014 | -1.960439 |
| 54               | 1                | 0              | -3.580938               | -3.835619 | -1.131371 |
| 55               | 1                | 0              | -1.996073               | -3.993450 | -1.904701 |
| 56               | 1                | 0              | -3.443874               | -3.772272 | -2.900468 |
| 57               | 6                | 0              | -4.402362               | -0.793551 | -2.316259 |
| 58               | 1                | 0              | -4.307954               | 0.297076  | -2.354811 |
| 59               | 1                | 0              | -5.166772               | -1.039202 | -1.571244 |
| 60               | 1                | 0              | -4.762155               | -1.136170 | -3.293635 |
| 61               | 6                | 0              | -4.954073               | -1.229164 | 1.806369  |
| 62               | 1                | 0              | -5.772262               | -0.815939 | 2.407907  |
| 63               | 1                | 0              | -4.500477               | -2.049801 | 2.373675  |
| 64               | 1                | 0              | -5.386284               | -1.654670 | 0.894407  |
| 65               | 6                | 0              | -4.525043               | 1.516349  | 0.492262  |
| 66               | 1                | 0              | -5.223988               | 1.125585  | -0.253744 |
| 67               | 1                | 0              | -3.807092               | 2.156571  | -0.031437 |



|    |    |   |           |           |           |
|----|----|---|-----------|-----------|-----------|
| 68 | 1  | 0 | -5.095306 | 2.139365  | 1.191863  |
| 69 | 6  | 0 | -3.006513 | 0.745845  | 3.072728  |
| 70 | 1  | 0 | -1.990925 | 1.150262  | 3.001403  |
| 71 | 1  | 0 | -2.977480 | -0.061923 | 3.810659  |
| 72 | 1  | 0 | -3.660551 | 1.532494  | 3.467873  |
| 73 | 82 | 0 | -0.143875 | 1.087273  | -0.921320 |
| 74 | 6  | 0 | -0.102942 | 3.341969  | 1.300194  |
| 75 | 6  | 0 | 0.788366  | 4.047908  | 0.484371  |
| 76 | 6  | 0 | 0.302685  | 4.914210  | -0.492925 |
| 77 | 6  | 0 | -1.070848 | 5.074719  | -0.663501 |
| 78 | 6  | 0 | -1.961854 | 4.370720  | 0.143536  |
| 79 | 6  | 0 | -1.481371 | 3.505928  | 1.126329  |
| 80 | 1  | 0 | 0.274314  | 2.682707  | 2.079847  |
| 81 | 1  | 0 | 1.858386  | 3.920294  | 0.612282  |
| 82 | 1  | 0 | 0.996734  | 5.459336  | -1.124349 |
| 83 | 1  | 0 | -1.447313 | 5.747304  | -1.427652 |
| 84 | 1  | 0 | -3.032302 | 4.495288  | 0.012444  |
| 85 | 1  | 0 | -2.179623 | 2.968287  | 1.760570  |

**Pb<sub>2</sub>H<sub>4</sub>. M06-2X / H: 6-31G(d); Pb: SDD C<sub>2h</sub>**

| Center Number | Atomic Number | Atomic Type | Coordinates (Angstroms) |           |           |
|---------------|---------------|-------------|-------------------------|-----------|-----------|
|               |               |             | X                       | Y         | Z         |
| 1             | 82            | 0           | 1.454492                | 0.063808  | 0.000000  |
| 2             | 1             | 0           | 2.189302                | -0.849316 | -1.362482 |
| 3             | 1             | 0           | 2.189302                | -0.849316 | 1.362482  |
| 4             | 82            | 0           | -1.454492               | -0.063808 | 0.000000  |
| 5             | 1             | 0           | -2.189302               | 0.849316  | 1.362482  |
| 6             | 1             | 0           | -2.189302               | 0.849316  | -1.362482 |

**Pb<sub>2</sub>H<sub>4</sub>. CCSD / H: cc-pVTZ; Pb: cc-pVTZ-PP C<sub>2h</sub>**

| Center Number | Atomic Number | Atomic Type | Coordinates (Angstroms) |           |           |
|---------------|---------------|-------------|-------------------------|-----------|-----------|
|               |               |             | X                       | Y         | Z         |
| 1             | 82            | 0           | 1.424677                | 0.072330  | 0.000000  |
| 2             | 1             | 0           | 2.162295                | -0.842545 | -1.356006 |
| 3             | 1             | 0           | 2.162295                | -0.842545 | 1.356006  |
| 4             | 82            | 0           | -1.424677               | -0.072330 | 0.000000  |
| 5             | 1             | 0           | -2.162295               | 0.842545  | 1.356006  |
| 6             | 1             | 0           | -2.162295               | 0.842545  | -1.356006 |

**Pb<sub>2</sub>H<sub>6</sub>. M06-2X / H: 6-31G(d); Pb: SDD D<sub>3d</sub>**

| Center Number | Atomic Number | Atomic Type | Coordinates (Angstroms) |           |           |
|---------------|---------------|-------------|-------------------------|-----------|-----------|
|               |               |             | X                       | Y         | Z         |
| 1             | 82            | 0           | 0.000000                | 0.000000  | -1.444173 |
| 2             | 1             | 0           | 0.000000                | 1.636490  | -2.058676 |
| 3             | 1             | 0           | -1.417242               | -0.818245 | -2.058676 |
| 4             | 1             | 0           | 1.417242                | -0.818245 | -2.058676 |
| 5             | 82            | 0           | 0.000000                | 0.000000  | 1.444173  |
| 6             | 1             | 0           | -1.417242               | 0.818245  | 2.058676  |
| 7             | 1             | 0           | 0.000000                | -1.636490 | 2.058676  |
| 8             | 1             | 0           | 1.417242                | 0.818245  | 2.058676  |

**Pb<sub>2</sub>H<sub>6</sub>**. CCSD / H: cc-pVTZ; Pb: cc-pVTZ-PP D<sub>3d</sub>

| Center Number | Atomic Number | Atomic Type | Coordinates (Angstroms) |           |           |
|---------------|---------------|-------------|-------------------------|-----------|-----------|
|               |               |             | X                       | Y         | Z         |
| 1             | 82            | 0           | 0.000000                | 0.000000  | -1.409829 |
| 2             | 1             | 0           | 0.000000                | 1.632155  | -2.035527 |
| 3             | 1             | 0           | -1.413488               | -0.816078 | -2.035527 |
| 4             | 1             | 0           | 1.413488                | -0.816078 | -2.035527 |
| 5             | 82            | 0           | 0.000000                | 0.000000  | 1.409829  |
| 6             | 1             | 0           | -1.413488               | 0.816078  | 2.035527  |
| 7             | 1             | 0           | 0.000000                | -1.632155 | 2.035527  |
| 8             | 1             | 0           | 1.413488                | 0.816078  | 2.035527  |

**PEt<sub>3</sub>**. M06-2X / 6-31G(d) C<sub>3</sub>

| Center Number | Atomic Number | Atomic Type | Coordinates (Angstroms) |           |           |
|---------------|---------------|-------------|-------------------------|-----------|-----------|
|               |               |             | X                       | Y         | Z         |
| 1             | 15            | 0           | 0.000000                | 0.000000  | -0.694170 |
| 2             | 6             | 0           | 1.623581                | 0.208616  | 0.201070  |
| 3             | 1             | 0           | 2.072591                | 1.144804  | -0.149131 |
| 4             | 1             | 0           | 1.442683                | 0.319637  | 1.279101  |
| 5             | 6             | 0           | 2.587931                | -0.948434 | -0.064297 |
| 6             | 1             | 0           | 3.568022                | -0.752629 | 0.381136  |
| 7             | 1             | 0           | 2.214836                | -1.885248 | 0.360622  |
| 8             | 1             | 0           | 2.731556                | -1.101792 | -1.138849 |
| 9             | 6             | 0           | -0.992457               | 1.301754  | 0.201070  |
| 10            | 1             | 0           | -2.027725               | 1.222514  | -0.149131 |
| 11            | 1             | 0           | -0.998155               | 1.089582  | 1.279101  |
| 12            | 6             | 0           | -0.472598               | 2.715431  | -0.064297 |
| 13            | 1             | 0           | -1.132215               | 3.466313  | 0.381136  |
| 14            | 1             | 0           | 0.525255                | 2.860729  | 0.360622  |
| 15            | 1             | 0           | -0.411599               | 2.916493  | -1.138849 |
| 16            | 6             | 0           | -0.631123               | -1.510370 | 0.201070  |
| 17            | 1             | 0           | -0.044866               | -2.367318 | -0.149131 |
| 18            | 1             | 0           | -0.444528               | -1.409218 | 1.279101  |
| 19            | 6             | 0           | -2.115334               | -1.766997 | -0.064297 |
| 20            | 1             | 0           | -2.435807               | -2.713683 | 0.381136  |
| 21            | 1             | 0           | -2.740091               | -0.975480 | 0.360622  |
| 22            | 1             | 0           | -2.319958               | -1.814701 | -1.138849 |

**C<sub>6</sub>H<sub>6</sub>** M06-2X / 6-31G(d) D<sub>6h</sub>

| Center Number | Atomic Number | Atomic Type | Coordinates (Angstroms) |           |          |
|---------------|---------------|-------------|-------------------------|-----------|----------|
|               |               |             | X                       | Y         | Z        |
| 1             | 6             | 0           | 0.000000                | 1.392659  | 0.000000 |
| 2             | 6             | 0           | 1.206078                | 0.696329  | 0.000000 |
| 3             | 6             | 0           | 1.206078                | -0.696329 | 0.000000 |
| 4             | 6             | 0           | 0.000000                | -1.392659 | 0.000000 |
| 5             | 6             | 0           | -1.206078               | -0.696329 | 0.000000 |
| 6             | 6             | 0           | -1.206078               | 0.696329  | 0.000000 |
| 7             | 1             | 0           | 0.000000                | 2.478596  | 0.000000 |
| 8             | 1             | 0           | 2.146527                | 1.239298  | 0.000000 |
| 9             | 1             | 0           | 2.146527                | -1.239298 | 0.000000 |
| 10            | 1             | 0           | 0.000000                | -2.478596 | 0.000000 |
| 11            | 1             | 0           | -2.146527               | -1.239298 | 0.000000 |
| 12            | 1             | 0           | -2.146527               | 1.239298  | 0.000000 |

## References

- (1) Glendening, E. D.; Reed, A. E.; Carpenter, J. E.; Weinhold, F. *NBO Version 3.1*,
- (2) Frisch, M. J.; Trucks, G. W.; Schlegel, H. B.; Scuseria, G. E.; Robb, M. A.; Cheeseman, J. R.; Scalmani, G.; Barone, V.; Mennucci, B.; Petersson, G. A.; Nakatsuji, H.; Caricato, M.; Li, X.; Hratchian, H. P.; Izmaylov, A. F.; Bloino, J.; Zheng, G.; Sonnenberg, J. L.; Hada, M.; Ehara, M.; Toyota, K.; Fukuda, R.; Hasegawa, J.; Ishida, M.; Nakajima, T.; Honda, Y.; Kitao, O.; Nakai, H.; Vreven, T.; Montgomery, J. J. A.; Peralta, J. E.; Ogliaro, F.; Bearpark, M.; Heyd, J. J.; Brothers, E.; Kudin, K. N.; Staroverov, V. N.; Keith, T.; Kobayashi, R.; Normand, J.; Raghavachari, K.; Rendell, A.; Burant, J. C.; Iyengar, S. S.; Tomasi, J.; Cossi, M.; Rega, N.; Millam, J. M.; Klene, M.; Knox, J. E.; Cross, J. B.; Bakken, V.; Adamo, C.; Jaramillo, J.; Gomperts, R.; Stratmann, R. E.; Yazyev, O.; Austin, A. J.; Cammi, R.; Pomelli, C.; Ochterski, J. W.; Martin, R. L.; Morokuma, K.; Zakrzewski, V. G.; Voth, G. A.; Salvador, P.; Dannenberg, J. J.; Dapprich, S.; Daniels, A. D.; Farkas, O.; Foresman, J. B.; Ortiz, J. V.; Cioslowski, J.; Fox, G. D. *J. Gaussian 09 Revision B. 01*, Gaussian, Inc., Wallingford **2010**.
- (3) Zhao, Y. Truhlar, D. *Theoretical Chemistry Accounts: Theory, Computation, and Modeling (Theoretica Chimica Acta)* **2008**, *120*, 215.
- (4) Ditchfield, R.; Hehre, W. J.; Pople, J. A. *J. Chem. Phys.* **1971**, *54*, 724.
- (5) Hehre, W. J.; Ditchfield, R.; Pople, J. A. *J. Chem. Phys.* **1972**, *56*, 2257.
- (6) Hariharan, P. C.; Pople, J. A. *Theor. Chem. Acc.* **1973**, *28*, 213.
- (7) Berger, A.; Dolg, M.; Küchle, W.; Stoll, H.; Preuß, H. *Molecular Physics* **1993**, *80*, 1431.
- (8) Purvis III, G. D.; Bartlett, R. J. *J. Chem. Phys.* **1982**, *76*, 1910.
- (9) Dunning, J. T. H. *J. Chem. Phys.* **1989**, *90*, 1007.
- (10) Peterson, K. A. *J. Chem. Phys.* **2003**, *119*, 11099.
- (11) Weigend, F.; Ahlrichs, R. *Phys. Chem. Chem. Phys.* **2005**, *7*, 3297.
- (12) Zhurko, G. D. *Chemcraft 1.6 Build 348*, [www.chemcraftprog.com](http://www.chemcraftprog.com), **2011**.
- (13) Dennington II, R. D.; Keith, T. A.; Millam, J. M. *GaussView 5.0.8*, Gaussian, Inc., Wallington, USA, **2008**.
- (14) Boys, S. F.; Bernardi, F. *Mol. Phys.* **1970**, *19*, 553.
- (15) Cheeseman, J. R.; Trucks, G. W.; Keith, T. A.; Frisch, M. J. *J. Chem. Phys.*, **1996**, *104* 5497.
- (16) Tomasi, J.; Mennucci, B.; Cammi, R. *Chem. Rev.*, **105** (2005) 2999-3093.
- (17) Ochterski, J. W. *Thermochemistry in Gaussian*, in *White Papers* Gaussian Inc., **2000**, [http://www.gaussian.com/g\\_whitepap/remote.htm](http://www.gaussian.com/g_whitepap/remote.htm) (October, 18<sup>th</sup>. 2011).
